# Supplementary material
Source: bioRxiv or medRxiv preprint supplement (https://www.biorxiv.org/highwire/filestream/124413/field_highwire_adjunct_files/0/412098-1.pdf)
Supplement: Supplementary file [file 412098-1.pdf]

## **Supplemental Material:** Evidence of causal effect of major depression on alcohol dependence: Findings from the Psychiatric Genomics Consortium.

Renato Polimanti\*, Roseann E. Peterson\*, Jue-Sheng Ong, Stuart MacGregor, Alexis C. Edwards, Toni-Kim Clarke, Josef Frank, Zachary Gerring, Nathan A. Gillespie, Penelope A. Lind, Hermine H. Maes, Nicholas G. Martin, Hamdi Mbarek, Sarah E. Medland, Fabian Streit, Major Depressive Disorder Working Group of the Psychiatric Genomics Consortium, Substance Use Disorder Working Group of the Psychiatric Genomics Consortium, 23andMe Research Team, Arpana Agrawal, Howard J. Edenberg, Kenneth S. Kendler, Cathryn M. Lewis, Patrick F. Sullivan, Naomi R. Wray, Joel Gelernter, Eske M. Derks<sup>#</sup>.

\*Joint first authors.

<sup>#</sup>Correspondence should be addressed to: Eske M. Derks, PhD. QIMR Berghofer. 300 Herston Road, Herston QLD 4006, Brisbane, Australia. E-mail: [eske.derks@qimrberghofer.edu.au](mailto:eske.derks@qimrberghofer.edu.au)

|                                                                                                                   |          |
|-------------------------------------------------------------------------------------------------------------------|----------|
| <b>Supplemental Tables</b>                                                                                        | <b>3</b> |
| Supplemental Table S1: Results of the most significant MR approach for each of the MR tests conducted.            | 3        |
| Supplemental Table S2: Listing of 28 Mendelian randomization methods and corresponding variant filtering applied. | 4        |
| Supplemental Table S3: Results from 28 MR methods for the 17 causal models tested.                                | 5        |
| S3.1: ACF→AD                                                                                                      | 5        |
| S3.2: ACF→MD                                                                                                      | 6        |
| S3.3: ACFe-5→AD                                                                                                   | 7        |
| S3.4: ACFe-5→MD                                                                                                   | 8        |
| S3.5: ACQ→AD                                                                                                      | 8        |
| S3.6: ACQ→MD                                                                                                      | 10       |
| S3.7: ACQe-5→AD                                                                                                   | 11       |
| S3.8: ACQe-5→MD                                                                                                   | 12       |
| S3.9: ADe-5→ACF                                                                                                   | 13       |
| S3.10: ADe-5→ACQ                                                                                                  | 14       |
| S3.11: ADe-5→MD                                                                                                   | 15       |
| S3.12: MDe-5→ACF                                                                                                  | 16       |
| S3.13: MDe-5→ACQ                                                                                                  | 17       |
| S3.14: MDe-5→AD                                                                                                   | 18       |
| S3.15: MD→ACF                                                                                                     | 19       |
| S3.16: MD→ACQ                                                                                                     | 20       |

|                                                                                                                                                              |           |
|--------------------------------------------------------------------------------------------------------------------------------------------------------------|-----------|
| S3.17: MD→AD                                                                                                                                                 | 21        |
| Supplemental Table S4: MR-Egger intercept analysis conducted on the 14 findings surviving Bonferroni multiple testing correction.                            | 22        |
| Supplemental Table S5: Heterogeneity tests conducted with respect to 14 MR tests surviving Bonferroni multiple testing correction.                           | 23        |
| Supplemental Table S6: List of the variants included in the genetic instruments.                                                                             | 24        |
| <b>Supplemental Figures</b>                                                                                                                                  | <b>29</b> |
| Supplemental Figure S1: Funnel plot (left) and leave-one-out analysis (right) related to the MDe-5 genetic instrument with respect to AD outcome (MDe-5→AD). | 29        |
| Supplemental Figure S2: SNP-exposure (AD associations, logOR) and SNP-outcome (MD associations, logOR) coefficients used in the MR analysis.                 | 30        |
| Supplemental Figure S3: Distribution of frequency of drinking in the UK Biobank sample.                                                                      | 31        |
| <b>Supplemental Methods</b>                                                                                                                                  | <b>32</b> |
| Quality checks of UKB alcohol consumption measures                                                                                                           | 32        |
| LD score regression analysis                                                                                                                                 | 33        |
| <b>Listing of Psychiatric Genomics Consortium Members</b>                                                                                                    | <b>34</b> |
| Major Depressive Disorder Working Group                                                                                                                      | 34        |
| Substance Use Disorder Working Group                                                                                                                         | 42        |
| <b>Acknowledgements</b>                                                                                                                                      | <b>46</b> |

**Supplemental Tables**

Supplemental Table S1: Results of the most significant MR approach for each of the MR tests conducted.

| Test            | Method             | SNPs | Estimate | SE    | CI_low | CI_upp | P        |
|-----------------|--------------------|------|----------|-------|--------|--------|----------|
| 1. ACF→AD       | Egger              | 92   | -1.967   | 0.258 | -2.473 | -1.460 | 2.51E-11 |
| 2. ACF→MD       | IVW                | 96   | 0.031    | 0.013 | 0.006  | 0.056  | 0.016    |
| 3. ACFe-5→AD    | Egger              | 773  | -0.747   | 0.159 | -1.060 | -0.435 | 3.24E-06 |
| 4. ACFe-5→MD    | IVW                | 795  | 0.074    | 0.008 | 0.058  | 0.089  | 6.50E-20 |
| 5. ACQ→AD       | IVW                | 31   | 0.117    | 0.012 | 0.094  | 0.139  | 3.81E-11 |
| 6. ACQ→MD       | IVW                | 30   | 0.007    | 0.001 | 0.004  | 0.010  | 8.06E-05 |
| 7. ACQe-5→AD    | IVW                | 385  | 0.060    | 0.006 | 0.048  | 0.072  | 7.34E-20 |
| 8. ACQe-5→MD    | IVW                | 405  | 0.008    | 0.001 | 0.006  | 0.009  | 2.43E-17 |
| 9. ADe-5→ACF    | Egger              | 96   | -0.055   | 0.002 | -0.059 | -0.051 | 9.11E-48 |
| 10. ADe-5→ACQ   | IVW                | 95   | 0.262    | 0.013 | 0.237  | 0.288  | 3.26E-36 |
| 11. ADe-5→MD    | IVW                | 99   | 0.006    | 0.004 | -0.001 | 0.013  | 0.100    |
| 12. MDe-5→ACF   | IVW                | 252  | 0.024    | 0.004 | 0.016  | 0.032  | 1.27E-08 |
| 13. MDe-5→ACQ   | IVW                | 251  | 0.306    | 0.062 | 0.185  | 0.428  | 1.46E-06 |
| 14. MDe-5→ADe-5 | IVW                | 259  | 0.280    | 0.056 | 0.169  | 0.390  | 1.29E-06 |
| 15. MD→ACF      | IVW                | 36   | 0.053    | 0.008 | 0.038  | 0.068  | 4.06E-08 |
| 16. MD→ACQ      | Egger              | 36   | -4.773   | 0.534 | -5.820 | -3.726 | 1.93E-10 |
| 17. MD→AD       | Rucker median (JK) | 40   | 0.277    | 0.104 | 0.038  | 0.470  | 0.01     |

Note: IVW (inverse variance-weighted); JK (jackknife).

Supplemental Table S2: Listing of 28 Mendelian randomization methods and corresponding variant filtering applied.

|    | Method                | Variant Filtering |
|----|-----------------------|-------------------|
| 1  | Egger fixed effects   | steiger           |
| 2  | Egger fixed effects   | tophits           |
| 3  | Egger random effects  | steiger           |
| 4  | Egger random effects  | tophits           |
| 5  | IVW fixed effects     | steiger           |
| 6  | IVW fixed effects     | tophits           |
| 7  | IVW random effects    | steiger           |
| 8  | IVW random effects    | tophits           |
| 9  | Penalised median      | steiger           |
| 10 | Penalised median      | tophits           |
| 11 | Rucker mean (JK)      | steiger           |
| 12 | Rucker mean (JK)      | tophits           |
| 13 | Rucker median (JK)    | steiger           |
| 14 | Rucker median (JK)    | tophits           |
| 15 | Rucker point estimate | steiger           |
| 16 | Rucker point estimate | tophits           |
| 17 | Simple median         | steiger           |
| 18 | Simple median         | tophits           |
| 19 | Simple mode           | steiger           |
| 20 | Simple mode           | tophits           |
| 21 | Simple mode (NOME)    | steiger           |
| 22 | Simple mode (NOME)    | tophits           |
| 23 | Weighted median       | steiger           |
| 24 | Weighted median       | tophits           |
| 25 | Weighted mode         | steiger           |
| 26 | Weighted mode         | tophits           |
| 27 | Weighted mode (NOME)  | steiger           |
| 28 | Weighted mode(NOME)   | tophits           |

Note: JK (jackknife); NOME (NO Measurement Error).

Supplemental Table S3: Results from 28 MR methods for the 17 causal models tested.

## S3.1: ACF→AD

|    | Method - Filtering              | SNPs | Estimate | SE    | CI_low | CI_upp | P        |
|----|---------------------------------|------|----------|-------|--------|--------|----------|
| 1  | Egger fixed effects - steiger   | 92   | -1.967   | 0.258 | -2.473 | -1.460 | 2.51E-11 |
| 2  | Egger fixed effects - tophits   | 92   | -1.967   | 0.258 | -2.473 | -1.460 | 2.51E-11 |
| 3  | Egger random effects - steiger  | 92   | -1.967   | 0.344 | -2.641 | -1.292 | 1.42E-07 |
| 4  | Egger random effects - tophits  | 92   | -1.967   | 0.344 | -2.641 | -1.292 | 1.42E-07 |
| 5  | IVW fixed effects - steiger     | 92   | -0.398   | 0.091 | -0.576 | -0.221 | 2.96E-05 |
| 6  | IVW fixed effects - tophits     | 92   | -0.398   | 0.091 | -0.576 | -0.221 | 2.96E-05 |
| 7  | IVW random effects - steiger    | 92   | -0.398   | 0.152 | -0.696 | -0.100 | 0.010    |
| 8  | IVW random effects - tophits    | 92   | -0.398   | 0.152 | -0.696 | -0.100 | 0.010    |
| 9  | Penalised median - steiger      | 92   | -0.119   | 0.195 | -0.502 | 0.263  | 0.541    |
| 10 | Penalised median - tophits      | 92   | -0.119   | 0.205 | -0.520 | 0.282  | 0.560    |
| 11 | Rucker mean (JK) - steiger      | 92   | -1.448   | 0.985 | 0.482  | -3.379 | 0.145    |
| 12 | Rucker mean (JK) - tophits      | 92   | -1.502   | 0.965 | 0.389  | -3.393 | 0.123    |
| 13 | Rucker median (JK) - steiger    | 92   | -1.902   | 0.752 | -2.635 | 0.056  | 0.013    |
| 14 | Rucker median (JK) - tophits    | 92   | -1.932   | 0.698 | -2.603 | 0.059  | 0.007    |
| 15 | Rucker point estimate - steiger | 92   | -1.967   | 0.344 | -2.641 | -1.292 | 1.42E-07 |
| 16 | Rucker point estimate - tophits | 92   | -1.967   | 0.344 | -2.641 | -1.292 | 1.42E-07 |
| 17 | Simple median - steiger         | 92   | -0.051   | 0.187 | -0.417 | 0.315  | 0.784    |
| 18 | Simple median - tophits         | 92   | -0.051   | 0.186 | -0.417 | 0.314  | 0.783    |
| 19 | Simple mode - steiger           | 92   | -0.153   | 0.533 | -1.198 | 0.892  | 0.774    |
| 20 | Simple mode - tophits           | 92   | -0.153   | 0.480 | -1.093 | 0.787  | 0.750    |
| 21 | Simple mode (NOME) - steiger    | 92   | -0.153   | 0.479 | -1.092 | 0.785  | 0.749    |
| 22 | Simple mode (NOME) - tophits    | 92   | -0.153   | 0.543 | -1.218 | 0.911  | 0.778    |
| 23 | Weighted median - steiger       | 92   | -0.199   | 0.202 | -0.595 | 0.197  | 0.324    |
| 24 | Weighted median - tophits       | 92   | -0.199   | 0.195 | -0.582 | 0.183  | 0.307    |
| 25 | Weighted mode - steiger         | 92   | -0.242   | 0.410 | -1.046 | 0.562  | 0.557    |
| 26 | Weighted mode - tophits         | 92   | -0.242   | 0.402 | -1.031 | 0.547  | 0.549    |
| 27 | Weighted mode (NOME) - steiger  | 92   | -0.242   | 0.423 | -1.070 | 0.586  | 0.568    |
| 28 | Weighted mode (NOME) - tophits  | 92   | -0.242   | 0.398 | -1.022 | 0.538  | 0.545    |

## S3.2: ACF→MD

|    | Method - Filtering              | SNPs | Estimate | SE    | CI_low | CI_upp | P     |
|----|---------------------------------|------|----------|-------|--------|--------|-------|
| 1  | Egger fixed effects - steiger   | 96   | -0.004   | 0.029 | -0.060 | 0.052  | 0.879 |
| 2  | Egger fixed effects - tophits   | 96   | -0.004   | 0.029 | -0.060 | 0.052  | 0.879 |
| 3  | Egger random effects - steiger  | 96   | -0.004   | 0.094 | -0.190 | 0.181  | 0.963 |
| 4  | Egger random effects - tophits  | 96   | -0.004   | 0.094 | -0.190 | 0.181  | 0.963 |
| 5  | IVW fixed effects - steiger     | 96   | 0.031    | 0.013 | 0.006  | 0.056  | 0.016 |
| 6  | IVW fixed effects - tophits     | 96   | 0.031    | 0.013 | 0.006  | 0.056  | 0.016 |
| 7  | IVW random effects - steiger    | 96   | 0.031    | 0.042 | -0.050 | 0.113  | 0.455 |
| 8  | IVW random effects - tophits    | 96   | 0.031    | 0.042 | -0.050 | 0.113  | 0.455 |
| 9  | Penalised median - steiger      | 96   | -0.007   | 0.048 | -0.102 | 0.088  | 0.883 |
| 10 | Penalised median - tophits      | 96   | -0.007   | 0.045 | -0.096 | 0.081  | 0.875 |
| 11 | Rucker mean (JK) - steiger      | 96   | 0.020    | 0.079 | 0.174  | -0.135 | 0.802 |
| 12 | Rucker mean (JK) - tophits      | 96   | 0.018    | 0.077 | 0.170  | -0.134 | 0.816 |
| 13 | Rucker median (JK) - steiger    | 96   | 0.018    | 0.046 | -0.148 | 0.199  | 0.697 |
| 14 | Rucker median (JK) - tophits    | 96   | 0.019    | 0.045 | -0.153 | 0.178  | 0.682 |
| 15 | Rucker point estimate - steiger | 96   | 0.031    | 0.042 | -0.050 | 0.113  | 0.455 |
| 16 | Rucker point estimate - tophits | 96   | 0.031    | 0.042 | -0.050 | 0.113  | 0.455 |
| 17 | Simple median - steiger         | 96   | 0.080    | 0.044 | -0.006 | 0.166  | 0.070 |
| 18 | Simple median - tophits         | 96   | 0.080    | 0.043 | -0.005 | 0.164  | 0.064 |
| 19 | Simple mode - steiger           | 96   | 0.092    | 0.095 | -0.094 | 0.279  | 0.333 |
| 20 | Simple mode - tophits           | 96   | 0.092    | 0.096 | -0.096 | 0.281  | 0.338 |
| 21 | Simple mode (NOME) - steiger    | 96   | 0.092    | 0.092 | -0.089 | 0.274  | 0.320 |
| 22 | Simple mode (NOME) - tophits    | 96   | 0.092    | 0.098 | -0.100 | 0.285  | 0.350 |
| 23 | Weighted median - steiger       | 96   | -0.007   | 0.046 | -0.097 | 0.084  | 0.883 |
| 24 | Weighted median - tophits       | 96   | -0.007   | 0.046 | -0.097 | 0.083  | 0.882 |
| 25 | Weighted mode - steiger         | 96   | -0.004   | 0.045 | -0.092 | 0.084  | 0.927 |
| 26 | Weighted mode - tophits         | 96   | -0.004   | 0.044 | -0.091 | 0.083  | 0.926 |
| 27 | Weighted mode (NOME) - steiger  | 96   | -0.004   | 0.044 | -0.090 | 0.082  | 0.925 |
| 28 | Weighted mode (NOME) - tophits  | 96   | -0.004   | 0.048 | -0.098 | 0.090  | 0.932 |

## S3.3: ACFe-5→AD

|    | Method - Filtering              | SNPs | Estimate | SE    | CI_low | CI_upp | P        |
|----|---------------------------------|------|----------|-------|--------|--------|----------|
| 1  | Egger fixed effects - steiger   | 773  | -0.747   | 0.159 | -1.060 | -0.435 | 3.24E-06 |
| 2  | Egger fixed effects - tophits   | 773  | -0.747   | 0.159 | -1.060 | -0.435 | 3.24E-06 |
| 3  | Egger random effects - steiger  | 773  | -0.747   | 0.179 | -1.098 | -0.397 | 3.21E-05 |
| 4  | Egger random effects - tophits  | 773  | -0.747   | 0.179 | -1.098 | -0.397 | 3.21E-05 |
| 5  | IVW fixed effects - steiger     | 773  | -0.202   | 0.054 | -0.308 | -0.096 | 1.92E-04 |
| 6  | IVW fixed effects - tophits     | 773  | -0.202   | 0.054 | -0.308 | -0.096 | 1.92E-04 |
| 7  | IVW random effects - steiger    | 773  | -0.202   | 0.061 | -0.322 | -0.082 | 0.001    |
| 8  | IVW random effects - tophits    | 773  | -0.202   | 0.061 | -0.322 | -0.082 | 0.001    |
| 9  | Penalised median - steiger      | 773  | -0.117   | 0.094 | -0.302 | 0.068  | 0.214    |
| 10 | Penalised median - tophits      | 773  | -0.117   | 0.093 | -0.299 | 0.065  | 0.207    |
| 11 | Rucker mean (JK) - steiger      | 773  | -0.611   | 0.462 | 0.295  | -1.517 | 0.187    |
| 12 | Rucker mean (JK) - tophits      | 773  | -0.602   | 0.455 | 0.290  | -1.494 | 0.186    |
| 13 | Rucker median (JK) - steiger    | 773  | -0.643   | 0.671 | -1.509 | -0.043 | 0.339    |
| 14 | Rucker median (JK) - tophits    | 773  | -0.619   | 0.656 | -1.475 | -0.048 | 0.346    |
| 15 | Rucker point estimate - steiger | 773  | -0.747   | 0.179 | -1.098 | -0.397 | 3.21E-05 |
| 16 | Rucker point estimate - tophits | 773  | -0.747   | 0.179 | -1.098 | -0.397 | 3.21E-05 |
| 17 | Simple median - steiger         | 773  | -0.128   | 0.091 | -0.308 | 0.051  | 0.160    |
| 18 | Simple median - tophits         | 773  | -0.128   | 0.089 | -0.304 | 0.047  | 0.151    |
| 19 | Simple mode - steiger           | 773  | -0.069   | 0.362 | -0.778 | 0.640  | 0.848    |
| 20 | Simple mode - tophits           | 773  | -0.069   | 0.361 | -0.776 | 0.638  | 0.848    |
| 21 | Simple mode (NOME) - steiger    | 773  | -0.069   | 0.368 | -0.790 | 0.651  | 0.850    |
| 22 | Simple mode (NOME) - tophits    | 773  | -0.069   | 0.376 | -0.805 | 0.667  | 0.854    |
| 23 | Weighted median - steiger       | 773  | -0.144   | 0.096 | -0.332 | 0.044  | 0.133    |
| 24 | Weighted median - tophits       | 773  | -0.144   | 0.095 | -0.330 | 0.042  | 0.128    |
| 25 | Weighted mode - steiger         | 773  | -0.032   | 0.276 | -0.572 | 0.509  | 0.909    |
| 26 | Weighted mode - tophits         | 773  | -0.032   | 0.249 | -0.520 | 0.457  | 0.899    |
| 27 | Weighted mode (NOME) - steiger  | 773  | -0.032   | 0.294 | -0.608 | 0.545  | 0.915    |
| 28 | Weighted mode (NOME) - tophits  | 773  | -0.032   | 0.273 | -0.567 | 0.504  | 0.908    |

## S3.4: ACFe-5→MD

|    | Method - Filtering              | SNPs | Estimate | SE    | CI_low | CI_upp | P        |
|----|---------------------------------|------|----------|-------|--------|--------|----------|
| 1  | Egger fixed effects - steiger   | 795  | -0.001   | 0.021 | -0.042 | 0.041  | 0.980    |
| 2  | Egger fixed effects - tophits   | 795  | -0.001   | 0.021 | -0.042 | 0.041  | 0.980    |
| 3  | Egger random effects - steiger  | 795  | -0.001   | 0.046 | -0.090 | 0.089  | 0.991    |
| 4  | Egger random effects - tophits  | 795  | -0.001   | 0.046 | -0.090 | 0.089  | 0.991    |
| 5  | IVW fixed effects - steiger     | 795  | 0.074    | 0.008 | 0.058  | 0.089  | 6.50E-20 |
| 6  | IVW fixed effects - tophits     | 795  | 0.074    | 0.008 | 0.058  | 0.089  | 6.50E-20 |
| 7  | IVW random effects - steiger    | 795  | 0.074    | 0.017 | 0.041  | 0.107  | 1.48E-05 |
| 8  | IVW random effects - tophits    | 795  | 0.074    | 0.017 | 0.041  | 0.107  | 1.48E-05 |
| 9  | Penalised median - steiger      | 795  | 0.055    | 0.021 | 0.014  | 0.097  | 0.009    |
| 10 | Penalised median - tophits      | 795  | 0.055    | 0.022 | 0.013  | 0.098  | 0.011    |
| 11 | Rucker mean (JK) - steiger      | 795  | 0.010    | 0.052 | 0.112  | -0.093 | 0.851    |
| 12 | Rucker mean (JK) - tophits      | 795  | 0.008    | 0.053 | 0.111  | -0.096 | 0.885    |
| 13 | Rucker median (JK) - steiger    | 795  | 4.51E-04 | 0.059 | -0.089 | 0.098  | 0.994    |
| 14 | Rucker median (JK) - tophits    | 795  | -0.002   | 0.057 | -0.088 | 0.097  | 0.966    |
| 15 | Rucker point estimate - steiger | 795  | -0.001   | 0.046 | -0.090 | 0.089  | 0.991    |
| 16 | Rucker point estimate - tophits | 795  | -0.001   | 0.046 | -0.090 | 0.089  | 0.991    |
| 17 | Simple median - steiger         | 795  | 0.077    | 0.019 | 0.039  | 0.115  | 6.41E-05 |
| 18 | Simple median - tophits         | 795  | 0.077    | 0.018 | 0.041  | 0.113  | 2.80E-05 |
| 19 | Simple mode - steiger           | 795  | 0.076    | 0.082 | -0.084 | 0.236  | 0.353    |
| 20 | Simple mode - tophits           | 795  | 0.076    | 0.083 | -0.088 | 0.239  | 0.364    |
| 21 | Simple mode (NOME) - steiger    | 795  | 0.076    | 0.085 | -0.091 | 0.242  | 0.373    |
| 22 | Simple mode (NOME) - tophits    | 795  | 0.076    | 0.079 | -0.078 | 0.230  | 0.336    |
| 23 | Weighted median - steiger       | 795  | 0.055    | 0.021 | 0.014  | 0.097  | 0.009    |
| 24 | Weighted median - tophits       | 795  | 0.055    | 0.021 | 0.013  | 0.097  | 0.010    |
| 25 | Weighted mode - steiger         | 795  | 0.030    | 0.045 | -0.059 | 0.120  | 0.503    |
| 26 | Weighted mode - tophits         | 795  | 0.030    | 0.042 | -0.052 | 0.112  | 0.467    |
| 27 | Weighted mode (NOME) - steiger  | 795  | 0.046    | 0.044 | -0.040 | 0.132  | 0.299    |
| 28 | Weighted mode (NOME) - tophits  | 795  | 0.046    | 0.044 | -0.041 | 0.132  | 0.301    |



## S3.5: ACQ→AD

|    | Method - Filtering              | SNPs | Estimate | SE    | CI_low | CI_upp | P        |
|----|---------------------------------|------|----------|-------|--------|--------|----------|
| 1  | Egger fixed effects - steiger   | 31   | 0.196    | 0.025 | 0.146  | 0.245  | 1.50E-08 |
| 2  | Egger fixed effects - tophits   | 31   | 0.196    | 0.025 | 0.146  | 0.245  | 1.50E-08 |
| 3  | Egger random effects - steiger  | 31   | 0.196    | 0.031 | 0.134  | 0.257  | 7.97E-07 |
| 4  | Egger random effects - tophits  | 31   | 0.196    | 0.031 | 0.134  | 0.257  | 7.97E-07 |
| 5  | IVW fixed effects - steiger     | 31   | 0.117    | 0.012 | 0.094  | 0.139  | 3.81E-11 |
| 6  | IVW fixed effects - tophits     | 31   | 0.117    | 0.012 | 0.094  | 0.139  | 3.81E-11 |
| 7  | IVW random effects - steiger    | 31   | 0.117    | 0.018 | 0.081  | 0.152  | 3.79E-07 |
| 8  | IVW random effects - tophits    | 31   | 0.117    | 0.018 | 0.081  | 0.152  | 3.79E-07 |
| 9  | Penalised median - steiger      | 31   | 0.085    | 0.024 | 0.038  | 0.133  | 4.53E-04 |
| 10 | Penalised median - tophits      | 31   | 0.085    | 0.024 | 0.037  | 0.133  | 4.83E-04 |
| 11 | Rucker mean (JK) - steiger      | 31   | 0.148    | 0.058 | 0.262  | 0.035  | 0.016    |
| 12 | Rucker mean (JK) - tophits      | 31   | 0.149    | 0.058 | 0.263  | 0.034  | 0.016    |
| 13 | Rucker median (JK) - steiger    | 31   | 0.136    | 0.083 | 0.060  | 0.230  | 0.113    |
| 14 | Rucker median (JK) - tophits    | 31   | 0.139    | 0.085 | 0.062  | 0.231  | 0.112    |
| 15 | Rucker point estimate - steiger | 31   | 0.196    | 0.025 | 0.146  | 0.245  | 1.50E-08 |
| 16 | Rucker point estimate - tophits | 31   | 0.196    | 0.025 | 0.146  | 0.245  | 1.50E-08 |
| 17 | Simple median - steiger         | 31   | 0.092    | 0.025 | 0.042  | 0.142  | 2.97E-04 |
| 18 | Simple median - tophits         | 31   | 0.092    | 0.026 | 0.041  | 0.142  | 3.48E-04 |
| 19 | Simple mode - steiger           | 31   | 0.110    | 0.053 | 0.006  | 0.214  | 0.048    |
| 20 | Simple mode - tophits           | 31   | 0.110    | 0.050 | 0.011  | 0.208  | 0.037    |
| 21 | Simple mode (NOME) - steiger    | 31   | 0.110    | 0.053 | 0.005  | 0.214  | 0.049    |
| 22 | Simple mode (NOME) - tophits    | 31   | 0.110    | 0.055 | 0.003  | 0.217  | 0.054    |
| 23 | Weighted median - steiger       | 31   | 0.129    | 0.026 | 0.077  | 0.181  | 1.05E-06 |
| 24 | Weighted median - tophits       | 31   | 0.129    | 0.026 | 0.078  | 0.180  | 8.40E-07 |
| 25 | Weighted mode - steiger         | 31   | 0.052    | 0.058 | -0.061 | 0.165  | 0.373    |
| 26 | Weighted mode - tophits         | 31   | 0.052    | 0.056 | -0.059 | 0.163  | 0.364    |
| 27 | Weighted mode (NOME) - steiger  | 31   | 0.206    | 0.044 | 0.121  | 0.291  | 4.98E-05 |
| 28 | Weighted mode (NOME) - tophits  | 31   | 0.206    | 0.044 | 0.120  | 0.292  | 5.73E-05 |

## S3.6: ACQ→MD

|    | Method - Filtering              | SNPs | Estimate  | SE    | CI_low    | CI_upp | P        |
|----|---------------------------------|------|-----------|-------|-----------|--------|----------|
| 1  | Egger fixed effects - steiger   | 30   | -1.68E-04 | 0.003 | -0.005    | 0.005  | 0.948    |
| 2  | Egger fixed effects - tophits   | 30   | -1.68E-04 | 0.003 | -0.005    | 0.005  | 0.948    |
| 3  | Egger random effects - steiger  | 30   | -1.68E-04 | 0.009 | -0.018    | 0.018  | 0.985    |
| 4  | Egger random effects - tophits  | 30   | -1.68E-04 | 0.009 | -0.018    | 0.018  | 0.985    |
| 5  | IVW fixed effects - steiger     | 30   | 0.007     | 0.001 | 0.004     | 0.010  | 8.06E-05 |
| 6  | IVW fixed effects - tophits     | 30   | 0.007     | 0.001 | 0.004     | 0.010  | 8.06E-05 |
| 7  | IVW random effects - steiger    | 30   | 0.007     | 0.005 | -0.003    | 0.017  | 0.204    |
| 8  | IVW random effects - tophits    | 30   | 0.007     | 0.005 | -0.003    | 0.017  | 0.204    |
| 9  | Penalised median - steiger      | 30   | 0.002     | 0.004 | -0.007    | 0.010  | 0.721    |
| 10 | Penalised median - tophits      | 30   | 0.002     | 0.004 | -0.007    | 0.010  | 0.709    |
| 11 | Rucker mean (JK) - steiger      | 30   | 0.002     | 0.010 | 0.023     | -0.018 | 0.816    |
| 12 | Rucker mean (JK) - tophits      | 30   | 0.003     | 0.010 | 0.022     | -0.017 | 0.799    |
| 13 | Rucker median (JK) - steiger    | 30   | 0.002     | 0.006 | -0.020    | 0.021  | 0.688    |
| 14 | Rucker median (JK) - tophits    | 30   | 0.002     | 0.006 | -0.019    | 0.022  | 0.704    |
| 15 | Rucker point estimate - steiger | 30   | 0.007     | 0.005 | -0.003    | 0.017  | 0.204    |
| 16 | Rucker point estimate - tophits | 30   | 0.007     | 0.005 | -0.003    | 0.017  | 0.204    |
| 17 | Simple median - steiger         | 30   | 0.011     | 0.006 | -2.72E-04 | 0.022  | 0.056    |
| 18 | Simple median - tophits         | 30   | 0.011     | 0.005 | 2.45E-05  | 0.021  | 0.049    |
| 19 | Simple mode - steiger           | 30   | 0.012     | 0.011 | -0.009    | 0.034  | 0.275    |
| 20 | Simple mode - tophits           | 30   | 0.012     | 0.010 | -0.008    | 0.033  | 0.257    |
| 21 | Simple mode (NOME) - steiger    | 30   | 0.012     | 0.012 | -0.011    | 0.035  | 0.308    |
| 22 | Simple mode (NOME) - tophits    | 30   | 0.012     | 0.012 | -0.010    | 0.035  | 0.301    |
| 23 | Weighted median - steiger       | 30   | 0.002     | 0.004 | -0.006    | 0.010  | 0.653    |
| 24 | Weighted median - tophits       | 30   | 0.002     | 0.004 | -0.007    | 0.011  | 0.662    |
| 25 | Weighted mode - steiger         | 30   | 0.001     | 0.004 | -0.007    | 0.010  | 0.753    |
| 26 | Weighted mode - tophits         | 30   | 0.001     | 0.004 | -0.006    | 0.009  | 0.718    |
| 27 | Weighted mode (NOME) - steiger  | 30   | 0.002     | 0.004 | -0.006    | 0.010  | 0.652    |
| 28 | Weighted mode (NOME) - tophits  | 30   | 0.002     | 0.004 | -0.006    | 0.010  | 0.649    |

## S3.7: ACQe-5→AD

|    | Method - Filtering              | SNPs | Estimate | SE    | CI_low | CI_upp | P        |
|----|---------------------------------|------|----------|-------|--------|--------|----------|
| 1  | Egger fixed effects - steiger   | 385  | 0.115    | 0.017 | 0.081  | 0.149  | 8.77E-11 |
| 2  | Egger fixed effects - tophits   | 385  | 0.115    | 0.017 | 0.081  | 0.149  | 8.77E-11 |
| 3  | Egger random effects - steiger  | 385  | 0.115    | 0.019 | 0.078  | 0.153  | 4.51E-09 |
| 4  | Egger random effects - tophits  | 385  | 0.115    | 0.019 | 0.078  | 0.153  | 4.51E-09 |
| 5  | IVW fixed effects - steiger     | 385  | 0.060    | 0.006 | 0.048  | 0.072  | 7.34E-20 |
| 6  | IVW fixed effects - tophits     | 385  | 0.060    | 0.006 | 0.048  | 0.072  | 7.34E-20 |
| 7  | IVW random effects - steiger    | 385  | 0.060    | 0.007 | 0.046  | 0.074  | 4.63E-16 |
| 8  | IVW random effects - tophits    | 385  | 0.060    | 0.007 | 0.046  | 0.074  | 4.63E-16 |
| 9  | Penalised median - steiger      | 385  | 0.045    | 0.011 | 0.024  | 0.066  | 1.92E-05 |
| 10 | Penalised median - tophits      | 385  | 0.045    | 0.011 | 0.024  | 0.066  | 3.78E-05 |
| 11 | Rucker mean (JK) - steiger      | 385  | 0.091    | 0.044 | 0.177  | 0.004  | 0.040    |
| 12 | Rucker mean (JK) - tophits      | 385  | 0.090    | 0.043 | 0.174  | 0.006  | 0.035    |
| 13 | Rucker median (JK) - steiger    | 385  | 0.066    | 0.030 | 0.042  | 0.174  | 0.029    |
| 14 | Rucker median (JK) - tophits    | 385  | 0.067    | 0.034 | 0.040  | 0.168  | 0.048    |
| 15 | Rucker point estimate - steiger | 385  | 0.115    | 0.017 | 0.081  | 0.149  | 8.77E-11 |
| 16 | Rucker point estimate - tophits | 385  | 0.115    | 0.017 | 0.081  | 0.149  | 8.77E-11 |
| 17 | Simple median - steiger         | 385  | 0.050    | 0.010 | 0.031  | 0.070  | 5.35E-07 |
| 18 | Simple median - tophits         | 385  | 0.050    | 0.010 | 0.031  | 0.070  | 3.37E-07 |
| 19 | Simple mode - steiger           | 385  | 0.035    | 0.040 | -0.043 | 0.113  | 0.378    |
| 20 | Simple mode - tophits           | 385  | 0.035    | 0.038 | -0.039 | 0.109  | 0.355    |
| 21 | Simple mode (NOME) - steiger    | 385  | 0.035    | 0.039 | -0.041 | 0.111  | 0.366    |
| 22 | Simple mode (NOME) - tophits    | 385  | 0.035    | 0.039 | -0.042 | 0.112  | 0.372    |
| 23 | Weighted median - steiger       | 385  | 0.056    | 0.010 | 0.036  | 0.076  | 3.49E-08 |
| 24 | Weighted median - tophits       | 385  | 0.056    | 0.011 | 0.035  | 0.077  | 1.85E-07 |
| 25 | Weighted mode - steiger         | 385  | 0.035    | 0.040 | -0.044 | 0.114  | 0.384    |
| 26 | Weighted mode - tophits         | 385  | 0.035    | 0.040 | -0.044 | 0.114  | 0.387    |
| 27 | Weighted mode (NOME) - steiger  | 385  | 0.035    | 0.047 | -0.057 | 0.127  | 0.454    |
| 28 | Weighted mode (NOME) - tophits  | 385  | 0.035    | 0.046 | -0.054 | 0.124  | 0.442    |

## S3.8: ACQe-5→MD

|    | Method - Filtering              | SNPs | Estimate | SE    | CI_low | CI_upp    | P        |
|----|---------------------------------|------|----------|-------|--------|-----------|----------|
| 1  | Egger fixed effects - steiger   | 405  | -0.005   | 0.002 | -0.009 | -3.26E-04 | 0.035    |
| 2  | Egger fixed effects - tophits   | 405  | -0.005   | 0.002 | -0.009 | -3.26E-04 | 0.035    |
| 3  | Egger random effects - steiger  | 405  | -0.005   | 0.005 | -0.014 | 0.005     | 0.367    |
| 4  | Egger random effects - tophits  | 405  | -0.005   | 0.005 | -0.014 | 0.005     | 0.367    |
| 5  | IVW fixed effects - steiger     | 405  | 0.008    | 0.001 | 0.006  | 0.009     | 2.43E-17 |
| 6  | IVW fixed effects - tophits     | 405  | 0.008    | 0.001 | 0.006  | 0.009     | 2.43E-17 |
| 7  | IVW random effects - steiger    | 405  | 0.008    | 0.002 | 0.004  | 0.011     | 2.16E-04 |
| 8  | IVW random effects - tophits    | 405  | 0.008    | 0.002 | 0.004  | 0.011     | 2.16E-04 |
| 9  | Penalised median - steiger      | 405  | 0.001    | 0.003 | -0.005 | 0.007     | 0.759    |
| 10 | Penalised median - tophits      | 405  | 0.001    | 0.003 | -0.005 | 0.007     | 0.760    |
| 11 | Rucker mean (JK) - steiger      | 405  | -0.005   | 0.005 | 0.005  | -0.015    | 0.339    |
| 12 | Rucker mean (JK) - tophits      | 405  | -0.005   | 0.005 | 0.005  | -0.015    | 0.305    |
| 13 | Rucker median (JK) - steiger    | 405  | -0.004   | 0.004 | -0.016 | 0.007     | 0.270    |
| 14 | Rucker median (JK) - tophits    | 405  | -0.005   | 0.004 | -0.017 | 0.006     | 0.253    |
| 15 | Rucker point estimate - steiger | 405  | -0.005   | 0.005 | -0.014 | 0.005     | 0.367    |
| 16 | Rucker point estimate - tophits | 405  | -0.005   | 0.005 | -0.014 | 0.005     | 0.367    |
| 17 | Simple median - steiger         | 405  | 0.005    | 0.002 | 0.001  | 0.010     | 0.015    |
| 18 | Simple median - tophits         | 405  | 0.005    | 0.002 | 0.001  | 0.010     | 0.014    |
| 19 | Simple mode - steiger           | 405  | -0.005   | 0.009 | -0.022 | 0.012     | 0.577    |
| 20 | Simple mode - tophits           | 405  | -0.005   | 0.008 | -0.020 | 0.011     | 0.533    |
| 21 | Simple mode (NOME) - steiger    | 405  | -0.005   | 0.008 | -0.021 | 0.011     | 0.558    |
| 22 | Simple mode (NOME) - tophits    | 405  | -0.005   | 0.009 | -0.022 | 0.012     | 0.573    |
| 23 | Weighted median - steiger       | 405  | 0.001    | 0.003 | -0.004 | 0.007     | 0.611    |
| 24 | Weighted median - tophits       | 405  | 0.001    | 0.003 | -0.004 | 0.007     | 0.625    |
| 25 | Weighted mode - steiger         | 405  | 3.99E-04 | 0.004 | -0.008 | 0.009     | 0.924    |
| 26 | Weighted mode - tophits         | 405  | 3.99E-04 | 0.004 | -0.007 | 0.008     | 0.918    |
| 27 | Weighted mode (NOME) - steiger  | 405  | 3.99E-04 | 0.004 | -0.008 | 0.008     | 0.922    |
| 28 | Weighted mode (NOME) - tophits  | 405  | 3.99E-04 | 0.004 | -0.008 | 0.008     | 0.922    |

## S3.9: ADe-5→ACF

|    | Method - Filtering              | SNPs | Estimate | SE    | CI_low | CI_upp    | P        |
|----|---------------------------------|------|----------|-------|--------|-----------|----------|
| 1  | Egger fixed effects - steiger   | 96   | -0.055   | 0.002 | -0.059 | -0.051    | 9.11E-48 |
| 2  | Egger fixed effects - tophits   | 96   | -0.055   | 0.002 | -0.059 | -0.051    | 9.11E-48 |
| 3  | Egger random effects - steiger  | 96   | -0.055   | 0.016 | -0.087 | -0.023    | 0.001    |
| 4  | Egger random effects - tophits  | 96   | -0.055   | 0.016 | -0.087 | -0.023    | 0.001    |
| 5  | IVW fixed effects - steiger     | 96   | -0.020   | 0.001 | -0.021 | -0.018    | 6.55E-39 |
| 6  | IVW fixed effects - tophits     | 96   | -0.020   | 0.001 | -0.021 | -0.018    | 6.55E-39 |
| 7  | IVW random effects - steiger    | 96   | -0.020   | 0.008 | -0.035 | -0.004    | 0.016    |
| 8  | IVW random effects - tophits    | 96   | -0.020   | 0.008 | -0.035 | -0.004    | 0.016    |
| 9  | Penalised median - steiger      | 96   | -0.005   | 0.004 | -0.013 | 0.003     | 0.251    |
| 10 | Penalised median - tophits      | 96   | -0.005   | 0.004 | -0.013 | 0.004     | 0.259    |
| 11 | Rucker mean (JK) - steiger      | 96   | -0.049   | 0.040 | 0.030  | -0.129    | 0.226    |
| 12 | Rucker mean (JK) - tophits      | 96   | -0.050   | 0.042 | 0.031  | -0.132    | 0.231    |
| 13 | Rucker median (JK) - steiger    | 96   | -0.051   | 0.055 | -0.143 | -4.77E-04 | 0.357    |
| 14 | Rucker median (JK) - tophits    | 96   | -0.050   | 0.057 | -0.141 | -4.16E-04 | 0.382    |
| 15 | Rucker point estimate - steiger | 96   | -0.055   | 0.016 | -0.087 | -0.023    | 0.001    |
| 16 | Rucker point estimate - tophits | 96   | -0.055   | 0.016 | -0.087 | -0.023    | 0.001    |
| 17 | Simple median - steiger         | 96   | -0.007   | 0.004 | -0.015 | 0.001     | 0.089    |
| 18 | Simple median - tophits         | 96   | -0.007   | 0.004 | -0.015 | 0.001     | 0.095    |
| 19 | Simple mode - steiger           | 96   | -0.011   | 0.010 | -0.032 | 0.010     | 0.295    |
| 20 | Simple mode - tophits           | 96   | -0.011   | 0.011 | -0.032 | 0.010     | 0.300    |
| 21 | Simple mode (NOME) - steiger    | 96   | -0.011   | 0.011 | -0.032 | 0.010     | 0.304    |
| 22 | Simple mode (NOME) - tophits    | 96   | -0.011   | 0.010 | -0.031 | 0.009     | 0.284    |
| 23 | Weighted median - steiger       | 96   | -0.005   | 0.004 | -0.013 | 0.003     | 0.238    |
| 24 | Weighted median - tophits       | 96   | -0.005   | 0.004 | -0.013 | 0.003     | 0.238    |
| 25 | Weighted mode - steiger         | 96   | -0.005   | 0.009 | -0.023 | 0.013     | 0.599    |
| 26 | Weighted mode - tophits         | 96   | -0.005   | 0.009 | -0.022 | 0.012     | 0.582    |
| 27 | Weighted mode (NOME) - steiger  | 96   | -0.006   | 0.010 | -0.025 | 0.013     | 0.539    |
| 28 | Weighted mode (NOME) - tophits  | 96   | -0.006   | 0.009 | -0.024 | 0.012     | 0.526    |

S3.10: ADe-5→ACQ

|    | Method - Filtering              | SNPs | Estimate | SE    | CI_low | CI_upp | P        |
|----|---------------------------------|------|----------|-------|--------|--------|----------|
| 1  | Egger fixed effects - steiger   | 95   | 0.496    | 0.027 | 0.442  | 0.549  | 3.22E-32 |
| 2  | Egger fixed effects - tophits   | 95   | 0.496    | 0.027 | 0.442  | 0.549  | 3.22E-32 |
| 3  | Egger random effects - steiger  | 95   | 0.496    | 0.187 | 0.128  | 0.863  | 0.010    |
| 4  | Egger random effects - tophits  | 95   | 0.496    | 0.187 | 0.128  | 0.863  | 0.010    |
| 5  | IVW fixed effects - steiger     | 95   | 0.262    | 0.013 | 0.237  | 0.288  | 3.26E-36 |
| 6  | IVW fixed effects - tophits     | 95   | 0.262    | 0.013 | 0.237  | 0.288  | 3.26E-36 |
| 7  | IVW random effects - steiger    | 95   | 0.262    | 0.089 | 0.088  | 0.437  | 0.004    |
| 8  | IVW random effects - tophits    | 95   | 0.262    | 0.089 | 0.088  | 0.437  | 0.004    |
| 9  | Penalised median - steiger      | 95   | 0.111    | 0.051 | 0.010  | 0.212  | 0.031    |
| 10 | Penalised median - tophits      | 95   | 0.111    | 0.051 | 0.011  | 0.211  | 0.030    |
| 11 | Rucker mean (JK) - steiger      | 95   | 0.501    | 0.427 | 1.339  | -0.337 | 0.244    |
| 12 | Rucker mean (JK) - tophits      | 95   | 0.496    | 0.418 | 1.315  | -0.322 | 0.238    |
| 13 | Rucker median (JK) - steiger    | 95   | 0.469    | 0.500 | -0.087 | 1.498  | 0.351    |
| 14 | Rucker median (JK) - tophits    | 95   | 0.471    | 0.498 | -0.090 | 1.418  | 0.347    |
| 15 | Rucker point estimate - steiger | 95   | 0.496    | 0.187 | 0.128  | 0.863  | 0.010    |
| 16 | Rucker point estimate - tophits | 95   | 0.496    | 0.187 | 0.128  | 0.863  | 0.010    |
| 17 | Simple median - steiger         | 95   | 0.130    | 0.053 | 0.027  | 0.233  | 0.013    |
| 18 | Simple median - tophits         | 95   | 0.130    | 0.051 | 0.031  | 0.230  | 0.010    |
| 19 | Simple mode - steiger           | 95   | 0.136    | 0.124 | -0.107 | 0.379  | 0.276    |
| 20 | Simple mode - tophits           | 95   | 0.136    | 0.126 | -0.111 | 0.383  | 0.285    |
| 21 | Simple mode (NOME) - steiger    | 95   | 0.136    | 0.132 | -0.123 | 0.395  | 0.307    |
| 22 | Simple mode (NOME) - tophits    | 95   | 0.136    | 0.132 | -0.123 | 0.395  | 0.307    |
| 23 | Weighted median - steiger       | 95   | 0.111    | 0.051 | 0.011  | 0.211  | 0.030    |
| 24 | Weighted median - tophits       | 95   | 0.111    | 0.052 | 0.009  | 0.213  | 0.033    |
| 25 | Weighted mode - steiger         | 95   | 0.124    | 0.109 | -0.089 | 0.337  | 0.256    |
| 26 | Weighted mode - tophits         | 95   | 0.124    | 0.113 | -0.097 | 0.345  | 0.274    |
| 27 | Weighted mode (NOME) - steiger  | 95   | 0.136    | 0.114 | -0.088 | 0.359  | 0.237    |
| 28 | Weighted mode (NOME) - tophits  | 95   | 0.136    | 0.122 | -0.102 | 0.374  | 0.267    |

## S3.11: ADe-5→MD

|    | Method - Filtering              | SNPs | Estimate | SE    | CI_low | CI_upp | P     |
|----|---------------------------------|------|----------|-------|--------|--------|-------|
| 1  | Egger fixed effects - steiger   | 99   | -0.008   | 0.008 | -0.024 | 0.008  | 0.330 |
| 2  | Egger fixed effects - tophits   | 99   | -0.008   | 0.008 | -0.024 | 0.008  | 0.330 |
| 3  | Egger random effects - steiger  | 99   | -0.008   | 0.011 | -0.030 | 0.014  | 0.489 |
| 4  | Egger random effects - tophits  | 99   | -0.008   | 0.011 | -0.030 | 0.014  | 0.489 |
| 5  | IVW fixed effects - steiger     | 99   | 0.006    | 0.004 | -0.001 | 0.013  | 0.100 |
| 6  | IVW fixed effects - tophits     | 99   | 0.006    | 0.004 | -0.001 | 0.013  | 0.100 |
| 7  | IVW random effects - steiger    | 99   | 0.006    | 0.005 | -0.004 | 0.016  | 0.246 |
| 8  | IVW random effects - tophits    | 99   | 0.006    | 0.005 | -0.004 | 0.016  | 0.246 |
| 9  | Penalised median - steiger      | 99   | 0.003    | 0.007 | -0.010 | 0.017  | 0.648 |
| 10 | Penalised median - tophits      | 99   | 0.003    | 0.007 | -0.010 | 0.016  | 0.636 |
| 11 | Rucker mean (JK) - steiger      | 99   | -0.003   | 0.013 | 0.022  | -0.027 | 0.828 |
| 12 | Rucker mean (JK) - tophits      | 99   | -0.003   | 0.012 | 0.021  | -0.027 | 0.807 |
| 13 | Rucker median (JK) - steiger    | 99   | 0.002    | 0.012 | -0.029 | 0.015  | 0.885 |
| 14 | Rucker median (JK) - tophits    | 99   | 0.001    | 0.012 | -0.029 | 0.014  | 0.909 |
| 15 | Rucker point estimate - steiger | 99   | 0.006    | 0.005 | -0.004 | 0.016  | 0.246 |
| 16 | Rucker point estimate - tophits | 99   | 0.006    | 0.005 | -0.004 | 0.016  | 0.246 |
| 17 | Simple median - steiger         | 99   | 0.004    | 0.007 | -0.010 | 0.017  | 0.601 |
| 18 | Simple median - tophits         | 99   | 0.004    | 0.007 | -0.010 | 0.017  | 0.598 |
| 19 | Simple mode - steiger           | 99   | -0.002   | 0.016 | -0.035 | 0.030  | 0.892 |
| 20 | Simple mode - tophits           | 99   | -0.002   | 0.016 | -0.034 | 0.029  | 0.890 |
| 21 | Simple mode (NOME) - steiger    | 99   | -0.002   | 0.018 | -0.037 | 0.033  | 0.900 |
| 22 | Simple mode (NOME) - tophits    | 99   | -0.002   | 0.017 | -0.036 | 0.031  | 0.897 |
| 23 | Weighted median - steiger       | 99   | 0.003    | 0.007 | -0.010 | 0.016  | 0.633 |
| 24 | Weighted median - tophits       | 99   | 0.003    | 0.007 | -0.010 | 0.016  | 0.633 |
| 25 | Weighted mode - steiger         | 99   | -0.003   | 0.014 | -0.031 | 0.024  | 0.808 |
| 26 | Weighted mode - tophits         | 99   | -0.003   | 0.014 | -0.030 | 0.023  | 0.801 |
| 27 | Weighted mode (NOME) - steiger  | 99   | -0.003   | 0.015 | -0.033 | 0.026  | 0.820 |
| 28 | Weighted mode (NOME) - tophits  | 99   | -0.003   | 0.015 | -0.032 | 0.026  | 0.816 |

S3.12: MDe-5→ACF

|    | Method - Filtering              | SNPs | Estimate | SE    | CI_low | CI_upp | P        |
|----|---------------------------------|------|----------|-------|--------|--------|----------|
| 1  | Egger fixed effects - steiger   | 252  | -0.009   | 0.010 | -0.028 | 0.010  | 0.347    |
| 2  | Egger fixed effects - tophits   | 252  | -0.009   | 0.010 | -0.028 | 0.010  | 0.347    |
| 3  | Egger random effects - steiger  | 252  | -0.009   | 0.031 | -0.071 | 0.053  | 0.772    |
| 4  | Egger random effects - tophits  | 252  | -0.009   | 0.031 | -0.071 | 0.053  | 0.772    |
| 5  | IVW fixed effects - steiger     | 252  | 0.024    | 0.004 | 0.016  | 0.032  | 1.27E-08 |
| 6  | IVW fixed effects - tophits     | 252  | 0.024    | 0.004 | 0.016  | 0.032  | 1.27E-08 |
| 7  | IVW random effects - steiger    | 252  | 0.024    | 0.013 | -0.002 | 0.050  | 0.072    |
| 8  | IVW random effects - tophits    | 252  | 0.024    | 0.013 | -0.002 | 0.050  | 0.072    |
| 9  | Penalised median - steiger      | 252  | 0.004    | 0.017 | -0.030 | 0.037  | 0.834    |
| 10 | Penalised median - tophits      | 252  | 0.004    | 0.018 | -0.031 | 0.038  | 0.837    |
| 11 | Rucker mean (JK) - steiger      | 252  | 0.001    | 0.026 | 0.051  | -0.050 | 0.984    |
| 12 | Rucker mean (JK) - tophits      | 252  | -0.001   | 0.026 | 0.051  | -0.053 | 0.971    |
| 13 | Rucker median (JK) - steiger    | 252  | 0.001    | 0.029 | -0.047 | 0.046  | 0.966    |
| 14 | Rucker median (JK) - tophits    | 252  | -0.002   | 0.030 | -0.051 | 0.043  | 0.946    |
| 15 | Rucker point estimate - steiger | 252  | -0.009   | 0.031 | -0.071 | 0.053  | 0.772    |
| 16 | Rucker point estimate - tophits | 252  | -0.009   | 0.031 | -0.071 | 0.053  | 0.772    |
| 17 | Simple median - steiger         | 252  | 0.037    | 0.013 | 0.012  | 0.062  | 0.004    |
| 18 | Simple median - tophits         | 252  | 0.037    | 0.013 | 0.011  | 0.062  | 0.004    |
| 19 | Simple mode - steiger           | 252  | 0.040    | 0.044 | -0.046 | 0.127  | 0.358    |
| 20 | Simple mode - tophits           | 252  | 0.040    | 0.044 | -0.045 | 0.126  | 0.355    |
| 21 | Simple mode (NOME) - steiger    | 252  | 0.040    | 0.046 | -0.049 | 0.130  | 0.378    |
| 22 | Simple mode (NOME) - tophits    | 252  | 0.040    | 0.047 | -0.053 | 0.134  | 0.395    |
| 23 | Weighted median - steiger       | 252  | 0.004    | 0.017 | -0.029 | 0.037  | 0.804    |
| 24 | Weighted median - tophits       | 252  | 0.004    | 0.016 | -0.028 | 0.036  | 0.801    |
| 25 | Weighted mode - steiger         | 252  | 0.001    | 0.019 | -0.037 | 0.038  | 0.963    |
| 26 | Weighted mode - tophits         | 252  | 0.001    | 0.018 | -0.034 | 0.036  | 0.960    |
| 27 | Weighted mode (NOME) - steiger  | 252  | 0.001    | 0.019 | -0.037 | 0.038  | 0.963    |
| 28 | Weighted mode (NOME) - tophits  | 252  | 0.001    | 0.020 | -0.038 | 0.040  | 0.964    |



## S3.13: MDe-5→ACQ

|    | Method - Filtering              | SNPs | Estimate | SE    | CI_low | CI_upp | P        |
|----|---------------------------------|------|----------|-------|--------|--------|----------|
| 1  | Egger fixed effects - steiger   | 251  | -0.494   | 0.177 | -0.842 | -0.147 | 0.006    |
| 2  | Egger fixed effects - tophits   | 251  | -0.494   | 0.177 | -0.842 | -0.147 | 0.006    |
| 3  | Egger random effects - steiger  | 251  | -0.494   | 0.438 | -1.354 | 0.365  | 0.261    |
| 4  | Egger random effects - tophits  | 251  | -0.494   | 0.438 | -1.354 | 0.365  | 0.261    |
| 5  | IVW fixed effects - steiger     | 251  | 0.306    | 0.062 | 0.185  | 0.428  | 1.46E-06 |
| 6  | IVW fixed effects - tophits     | 251  | 0.306    | 0.062 | 0.185  | 0.428  | 1.46E-06 |
| 7  | IVW random effects - steiger    | 251  | 0.306    | 0.155 | 0.002  | 0.611  | 0.050    |
| 8  | IVW random effects - tophits    | 251  | 0.306    | 0.155 | 0.002  | 0.611  | 0.050    |
| 9  | Penalised median - steiger      | 251  | 0.137    | 0.176 | -0.207 | 0.481  | 0.436    |
| 10 | Penalised median - tophits      | 251  | 0.137    | 0.163 | -0.183 | 0.457  | 0.402    |
| 11 | Rucker mean (JK) - steiger      | 251  | -0.534   | 0.503 | 0.451  | -1.519 | 0.289    |
| 12 | Rucker mean (JK) - tophits      | 251  | -0.466   | 0.496 | 0.505  | -1.437 | 0.348    |
| 13 | Rucker median (JK) - steiger    | 251  | -0.535   | 0.427 | -1.556 | 0.389  | 0.212    |
| 14 | Rucker median (JK) - tophits    | 251  | -0.458   | 0.471 | -1.473 | 0.411  | 0.333    |
| 15 | Rucker point estimate - steiger | 251  | -0.494   | 0.438 | -1.354 | 0.365  | 0.261    |
| 16 | Rucker point estimate - tophits | 251  | -0.494   | 0.438 | -1.354 | 0.365  | 0.261    |
| 17 | Simple median - steiger         | 251  | 0.249    | 0.161 | -0.066 | 0.564  | 0.122    |
| 18 | Simple median - tophits         | 251  | 0.249    | 0.160 | -0.066 | 0.563  | 0.121    |
| 19 | Simple mode - steiger           | 251  | -0.474   | 0.543 | -1.539 | 0.590  | 0.383    |
| 20 | Simple mode - tophits           | 251  | -0.474   | 0.570 | -1.592 | 0.643  | 0.406    |
| 21 | Simple mode (NOME) - steiger    | 251  | -0.474   | 0.596 | -1.642 | 0.693  | 0.426    |
| 22 | Simple mode (NOME) - tophits    | 251  | -0.474   | 0.546 | -1.544 | 0.595  | 0.385    |
| 23 | Weighted median - steiger       | 251  | 0.183    | 0.171 | -0.152 | 0.518  | 0.284    |
| 24 | Weighted median - tophits       | 251  | 0.183    | 0.166 | -0.143 | 0.509  | 0.271    |
| 25 | Weighted mode - steiger         | 251  | 0.259    | 0.431 | -0.587 | 1.104  | 0.549    |
| 26 | Weighted mode - tophits         | 251  | 0.259    | 0.455 | -0.634 | 1.151  | 0.570    |
| 27 | Weighted mode (NOME) - steiger  | 251  | 0.336    | 0.460 | -0.565 | 1.237  | 0.465    |
| 28 | Weighted mode (NOME) - tophits  | 251  | 0.336    | 0.458 | -0.562 | 1.234  | 0.464    |

## S3.14: MDe-5→AD

|    | Method - Filtering              | SNPs | Estimate | SE    | CI_low | CI_upp | P        |
|----|---------------------------------|------|----------|-------|--------|--------|----------|
| 1  | Egger fixed effects - steiger   | 259  | 0.070    | 0.191 | -0.305 | 0.445  | 0.715    |
| 2  | Egger fixed effects - tophits   | 259  | 0.070    | 0.191 | -0.305 | 0.445  | 0.715    |
| 3  | Egger random effects - steiger  | 259  | 0.070    | 0.210 | -0.342 | 0.482  | 0.739    |
| 4  | Egger random effects - tophits  | 259  | 0.070    | 0.210 | -0.342 | 0.482  | 0.739    |
| 5  | IVW fixed effects - steiger     | 259  | 0.280    | 0.056 | 0.169  | 0.390  | 1.29E-06 |
| 6  | IVW fixed effects - tophits     | 259  | 0.280    | 0.056 | 0.169  | 0.390  | 1.29E-06 |
| 7  | IVW random effects - steiger    | 259  | 0.280    | 0.062 | 0.158  | 0.401  | 9.64E-06 |
| 8  | IVW random effects - tophits    | 259  | 0.280    | 0.062 | 0.158  | 0.401  | 9.64E-06 |
| 9  | Penalised median - steiger      | 259  | 0.220    | 0.093 | 0.038  | 0.402  | 0.018    |
| 10 | Penalised median - tophits      | 259  | 0.220    | 0.093 | 0.037  | 0.403  | 0.018    |
| 11 | Rucker mean (JK) - steiger      | 259  | 0.266    | 0.100 | 0.462  | 0.070  | 0.008    |
| 12 | Rucker mean (JK) - tophits      | 259  | 0.267    | 0.104 | 0.471  | 0.063  | 0.011    |
| 13 | Rucker median (JK) - steiger    | 259  | 0.274    | 0.065 | -0.077 | 0.408  | 3.27E-05 |
| 14 | Rucker median (JK) - tophits    | 259  | 0.280    | 0.068 | -0.090 | 0.408  | 4.95E-05 |
| 15 | Rucker point estimate - steiger | 259  | 0.280    | 0.056 | 0.169  | 0.390  | 1.29E-06 |
| 16 | Rucker point estimate - tophits | 259  | 0.280    | 0.056 | 0.169  | 0.390  | 1.29E-06 |
| 17 | Simple median - steiger         | 259  | 0.301    | 0.091 | 0.123  | 0.479  | 9.36E-04 |
| 18 | Simple median - tophits         | 259  | 0.301    | 0.088 | 0.127  | 0.474  | 6.79E-04 |
| 19 | Simple mode - steiger           | 259  | 0.272    | 0.282 | -0.281 | 0.824  | 0.336    |
| 20 | Simple mode - tophits           | 259  | 0.272    | 0.303 | -0.323 | 0.866  | 0.371    |
| 21 | Simple mode (NOME) - steiger    | 259  | 0.272    | 0.286 | -0.289 | 0.832  | 0.343    |
| 22 | Simple mode (NOME) - tophits    | 259  | 0.272    | 0.316 | -0.347 | 0.890  | 0.390    |
| 23 | Weighted median - steiger       | 259  | 0.220    | 0.093 | 0.037  | 0.403  | 0.018    |
| 24 | Weighted median - tophits       | 259  | 0.220    | 0.091 | 0.042  | 0.398  | 0.016    |
| 25 | Weighted mode - steiger         | 259  | 0.122    | 0.202 | -0.273 | 0.518  | 0.545    |
| 26 | Weighted mode - tophits         | 259  | 0.122    | 0.219 | -0.307 | 0.551  | 0.577    |
| 27 | Weighted mode (NOME) - steiger  | 259  | 0.122    | 0.229 | -0.326 | 0.570  | 0.593    |
| 28 | Weighted mode (NOME) - tophits  | 259  | 0.122    | 0.241 | -0.351 | 0.595  | 0.613    |

## S3.15: MD→ACF

|    | Method - Filtering              | SNPs | Estimate | SE    | CI_low | CI_upp | P        |
|----|---------------------------------|------|----------|-------|--------|--------|----------|
| 1  | Egger fixed effects - steiger   | 36   | 0.032    | 0.035 | -0.037 | 0.100  | 0.373    |
| 2  | Egger fixed effects - tophits   | 36   | 0.032    | 0.035 | -0.037 | 0.100  | 0.373    |
| 3  | Egger random effects - steiger  | 36   | 0.032    | 0.190 | -0.340 | 0.403  | 0.868    |
| 4  | Egger random effects - tophits  | 36   | 0.032    | 0.190 | -0.340 | 0.403  | 0.868    |
| 5  | IVW fixed effects - steiger     | 36   | 0.053    | 0.008 | 0.038  | 0.068  | 4.06E-08 |
| 6  | IVW fixed effects - tophits     | 36   | 0.053    | 0.008 | 0.038  | 0.068  | 4.06E-08 |
| 7  | IVW random effects - steiger    | 36   | 0.053    | 0.040 | -0.025 | 0.131  | 0.193    |
| 8  | IVW random effects - tophits    | 36   | 0.053    | 0.040 | -0.025 | 0.131  | 0.193    |
| 9  | Penalised median - steiger      | 36   | 0.028    | 0.031 | -0.034 | 0.089  | 0.374    |
| 10 | Penalised median - tophits      | 36   | 0.028    | 0.032 | -0.035 | 0.091  | 0.387    |
| 11 | Rucker mean (JK) - steiger      | 36   | 0.078    | 0.187 | 0.444  | -0.289 | 0.681    |
| 12 | Rucker mean (JK) - tophits      | 36   | 0.071    | 0.180 | 0.424  | -0.282 | 0.696    |
| 13 | Rucker median (JK) - steiger    | 36   | 0.050    | 0.064 | -0.193 | 0.616  | 0.444    |
| 14 | Rucker median (JK) - tophits    | 36   | 0.048    | 0.065 | -0.196 | 0.559  | 0.464    |
| 15 | Rucker point estimate - steiger | 36   | 0.053    | 0.040 | -0.025 | 0.131  | 0.193    |
| 16 | Rucker point estimate - tophits | 36   | 0.053    | 0.040 | -0.025 | 0.131  | 0.193    |
| 17 | Simple median - steiger         | 36   | 0.045    | 0.031 | -0.015 | 0.106  | 0.144    |
| 18 | Simple median - tophits         | 36   | 0.045    | 0.032 | -0.017 | 0.108  | 0.154    |
| 19 | Simple mode - steiger           | 36   | 0.081    | 0.070 | -0.056 | 0.218  | 0.256    |
| 20 | Simple mode - tophits           | 36   | 0.081    | 0.066 | -0.048 | 0.210  | 0.226    |
| 21 | Simple mode (NOME) - steiger    | 36   | 0.081    | 0.073 | -0.062 | 0.224  | 0.275    |
| 22 | Simple mode (NOME) - tophits    | 36   | 0.081    | 0.068 | -0.052 | 0.214  | 0.241    |
| 23 | Weighted median - steiger       | 36   | 0.033    | 0.032 | -0.029 | 0.096  | 0.293    |
| 24 | Weighted median - tophits       | 36   | 0.033    | 0.031 | -0.027 | 0.094  | 0.278    |
| 25 | Weighted mode - steiger         | 36   | 0.043    | 0.059 | -0.073 | 0.159  | 0.469    |
| 26 | Weighted mode - tophits         | 36   | 0.043    | 0.056 | -0.067 | 0.153  | 0.446    |
| 27 | Weighted mode (NOME) - steiger  | 36   | 0.053    | 0.073 | -0.090 | 0.196  | 0.474    |
| 28 | Weighted mode (NOME) - tophits  | 36   | 0.053    | 0.067 | -0.079 | 0.184  | 0.437    |

## S3.16: MD→ACQ

|    | Method - Filtering              | SNPs | Estimate | SE    | CI_low  | CI_upp  | P        |
|----|---------------------------------|------|----------|-------|---------|---------|----------|
| 1  | Egger fixed effects - steiger   | 36   | -4.773   | 0.534 | -5.820  | -3.726  | 1.93E-10 |
| 2  | Egger fixed effects - tophits   | 36   | -4.773   | 0.534 | -5.820  | -3.726  | 1.93E-10 |
| 3  | Egger random effects - steiger  | 36   | -4.773   | 1.982 | -8.658  | -0.888  | 0.022    |
| 4  | Egger random effects - tophits  | 36   | -4.773   | 1.982 | -8.658  | -0.888  | 0.022    |
| 5  | IVW fixed effects - steiger     | 36   | -0.565   | 0.109 | -0.778  | -0.352  | 8.82E-06 |
| 6  | IVW fixed effects - tophits     | 36   | -0.565   | 0.109 | -0.778  | -0.352  | 8.82E-06 |
| 7  | IVW random effects - steiger    | 36   | -0.565   | 0.446 | -1.439  | 0.309   | 0.214    |
| 8  | IVW random effects - tophits    | 36   | -0.565   | 0.446 | -1.439  | 0.309   | 0.214    |
| 9  | Penalised median - steiger      | 36   | -1.118   | 0.370 | -1.843  | -0.393  | 0.002    |
| 10 | Penalised median - tophits      | 36   | -1.118   | 0.383 | -1.868  | -0.368  | 0.003    |
| 11 | Rucker mean (JK) - steiger      | 36   | -5.141   | 2.626 | 0.005   | -10.287 | 0.058    |
| 12 | Rucker mean (JK) - tophits      | 36   | -5.339   | 2.660 | -0.126  | -10.552 | 0.052    |
| 13 | Rucker median (JK) - steiger    | 36   | -4.739   | 2.236 | -10.764 | -0.537  | 0.041    |
| 14 | Rucker median (JK) - tophits    | 36   | -4.887   | 2.276 | -11.274 | -0.692  | 0.039    |
| 15 | Rucker point estimate - steiger | 36   | -4.773   | 1.982 | -8.658  | -0.888  | 0.022    |
| 16 | Rucker point estimate - tophits | 36   | -4.773   | 1.982 | -8.658  | -0.888  | 0.022    |
| 17 | Simple median - steiger         | 36   | -0.971   | 0.376 | -1.707  | -0.235  | 0.010    |
| 18 | Simple median - tophits         | 36   | -0.971   | 0.370 | -1.696  | -0.246  | 0.009    |
| 19 | Simple mode - steiger           | 36   | -1.507   | 0.677 | -2.833  | -0.181  | 0.032    |
| 20 | Simple mode - tophits           | 36   | -1.507   | 0.682 | -2.843  | -0.171  | 0.034    |
| 21 | Simple mode (NOME) - steiger    | 36   | -1.507   | 0.683 | -2.846  | -0.168  | 0.034    |
| 22 | Simple mode (NOME) - tophits    | 36   | -1.507   | 0.696 | -2.871  | -0.143  | 0.037    |
| 23 | Weighted median - steiger       | 36   | -0.986   | 0.372 | -1.715  | -0.256  | 0.008    |
| 24 | Weighted median - tophits       | 36   | -0.986   | 0.367 | -1.705  | -0.266  | 0.007    |
| 25 | Weighted mode - steiger         | 36   | -1.287   | 0.583 | -2.430  | -0.144  | 0.034    |
| 26 | Weighted mode - tophits         | 36   | -1.287   | 0.586 | -2.435  | -0.139  | 0.035    |
| 27 | Weighted mode (NOME) - steiger  | 36   | -1.350   | 0.674 | -2.672  | -0.028  | 0.053    |
| 28 | Weighted mode (NOME) - tophits  | 36   | -1.350   | 0.622 | -2.569  | -0.131  | 0.037    |

## S3.17: MD→AD

|    | Method - Filtering              | SNPs | Estimate | SE    | CI_low | CI_upp | P     |
|----|---------------------------------|------|----------|-------|--------|--------|-------|
| 1  | Egger fixed effects - steiger   | 40   | -0.357   | 0.846 | -2.016 | 1.301  | 0.675 |
| 2  | Egger fixed effects - tophits   | 40   | -0.357   | 0.846 | -2.016 | 1.301  | 0.675 |
| 3  | Egger random effects - steiger  | 40   | -0.357   | 0.699 | -1.727 | 1.012  | 0.612 |
| 4  | Egger random effects - tophits  | 40   | -0.357   | 0.699 | -1.727 | 1.012  | 0.612 |
| 5  | IVW fixed effects - steiger     | 40   | 0.274    | 0.138 | 0.004  | 0.544  | 0.054 |
| 6  | IVW fixed effects - tophits     | 40   | 0.274    | 0.138 | 0.004  | 0.544  | 0.054 |
| 7  | IVW random effects - steiger    | 40   | 0.274    | 0.113 | 0.052  | 0.496  | 0.021 |
| 8  | IVW random effects - tophits    | 40   | 0.274    | 0.113 | 0.052  | 0.496  | 0.021 |
| 9  | Penalised median - steiger      | 40   | 0.264    | 0.178 | -0.085 | 0.613  | 0.138 |
| 10 | Penalised median - tophits      | 40   | 0.264    | 0.179 | -0.087 | 0.615  | 0.140 |
| 11 | Rucker mean (JK) - steiger      | 40   | 0.279    | 0.106 | 0.487  | 0.070  | 0.012 |
| 12 | Rucker mean (JK) - tophits      | 40   | 0.270    | 0.108 | 0.481  | 0.059  | 0.016 |
| 13 | Rucker median (JK) - steiger    | 40   | 0.281    | 0.108 | 0.060  | 0.480  | 0.013 |
| 14 | Rucker median (JK) - tophits    | 40   | 0.277    | 0.104 | 0.038  | 0.470  | 0.011 |
| 15 | Rucker point estimate - steiger | 40   | 0.274    | 0.138 | 0.004  | 0.544  | 0.054 |
| 16 | Rucker point estimate - tophits | 40   | 0.274    | 0.138 | 0.004  | 0.544  | 0.054 |
| 17 | Simple median - steiger         | 40   | 0.309    | 0.175 | -0.034 | 0.653  | 0.078 |
| 18 | Simple median - tophits         | 40   | 0.309    | 0.168 | -0.021 | 0.639  | 0.066 |
| 19 | Simple mode - steiger           | 40   | 0.526    | 0.392 | -0.241 | 1.294  | 0.187 |
| 20 | Simple mode - tophits           | 40   | 0.526    | 0.399 | -0.257 | 1.309  | 0.195 |
| 21 | Simple mode (NOME) - steiger    | 40   | 0.526    | 0.372 | -0.202 | 1.255  | 0.165 |
| 22 | Simple mode (NOME) - tophits    | 40   | 0.526    | 0.367 | -0.193 | 1.246  | 0.160 |
| 23 | Weighted median - steiger       | 40   | 0.263    | 0.173 | -0.076 | 0.602  | 0.129 |
| 24 | Weighted median - tophits       | 40   | 0.263    | 0.175 | -0.080 | 0.605  | 0.132 |
| 25 | Weighted mode - steiger         | 40   | 0.289    | 0.347 | -0.392 | 0.969  | 0.411 |
| 26 | Weighted mode - tophits         | 40   | 0.289    | 0.360 | -0.418 | 0.995  | 0.428 |
| 27 | Weighted mode (NOME) - steiger  | 40   | 0.310    | 0.333 | -0.342 | 0.962  | 0.357 |
| 28 | Weighted mode (NOME) - tophits  | 40   | 0.310    | 0.349 | -0.375 | 0.995  | 0.380 |

Supplemental Table S4: MR-Egger intercept analysis conducted on the 14 findings surviving Bonferroni multiple testing correction.

| Test      | MR-Egger Estimate |       |          | MR-Egger Intercept |       |          | MR-Egger Intercept<br>(P > 0.1) |
|-----------|-------------------|-------|----------|--------------------|-------|----------|---------------------------------|
|           | Beta              | SE    | P        | Intercept          | SE    | P        |                                 |
| ACF→AD    | -0.75             | 0.18  | 3.21E-05 | 0.043              | 0.009 | 3.36E-06 | violated                        |
| ACFe-5→AD | -0.001            | 0.09  | 0.991    | 0.011              | 0.003 | 0.001    | violated                        |
| ACFe-5→MD | 0.12              | 0.02  | 4.51E-09 | 0.002              | 0.001 | 0.081    | violated                        |
| ACQ→AD    | -0.005            | 0.01  | 0.367    | -0.033             | 0.011 | 0.006    | violated                        |
| ACQ→MD    | 0.2               | 0.04  | 7.97E-07 | 0.003              | 0.003 | 0.354    | pass                            |
| ACQe-5→AD | <0.001            | <0.01 | 0.985    | -0.014             | 0.004 | 0.002    | violated                        |
| ACQe-5→MD | -1.97             | 0.37  | 1.42E-07 | 0.003              | 0.001 | 0.009    | violated                        |
| ADe-5→ACF | -0.05             | 0.02  | 0.001    | 0.007              | 0.003 | 0.017    | violated                        |
| ADe-5→ACQ | 0.5               | 0.19  | 0.010    | -0.046             | 0.032 | 0.161    | pass                            |
| MD→ACF    | -0.01             | 0.03  | 0.772    | 0.001              | 0.006 | 0.908    | pass                            |
| MD→ACQ    | -0.49             | 0.44  | 0.261    | 0.142              | 0.065 | 0.037    | violated                        |
| MDe-5→ACF | 0.07              | 0.21  | 0.739    | 0.001              | 0.001 | 0.247    | pass                            |
| MDe-5→ACQ | 0.03              | 0.18  | 0.868    | 0.027              | 0.014 | 0.052    | violated                        |
| MDe-5→AD  | -4.77             | 2.08  | 0.022    | 0.007              | 0.006 | 0.297    | pass                            |

Note: Abbreviations: ACF, alcohol consumption frequency; ACQ, alcohol consumption quantity; AD, alcohol dependence; MD, major depression. An intercept significantly different from zero suggests directional pleiotropy.

Supplemental Table S5: Heterogeneity tests conducted with respect to 14 MR tests surviving Bonferroni multiple testing correction.

| Test      | Maximum likelihood |     |          | MR Egger |     |          | IVW    |     |          | Heterogeneity (P>0.05) |
|-----------|--------------------|-----|----------|----------|-----|----------|--------|-----|----------|------------------------|
|           | Q                  | df  | P        | Q        | df  | P        | Q      | df  | P        |                        |
| ACF→AD    | 152.4              | 91  | 5.87E-05 | 120.0    | 90  | 0.019    | 151.0  | 91  | 7.88E-05 | violated               |
| ACFe-5→AD | 875.7              | 772 | 0.005    | 864.3    | 771 | 0.011    | 875.0  | 772 | 0.006    | violated               |
| ACFe-5→MD | 1707.1             | 794 | 8.72E-69 | 1702.7   | 793 | 1.94E-68 | 1707.1 | 794 | 8.73E-69 | violated               |
| ACQ→AD    | 45.8               | 30  | 0.033    | 36.0     | 29  | 0.175    | 45.2   | 30  | 0.037    | violated               |
| ACQ→MD    | 102.1              | 29  | 4.48E-10 | 99.2     | 28  | 6.91E-10 | 98.8   | 29  | 1.53E-09 | violated               |
| ACQE-5→AD | 433.7              | 384 | 0.040    | 425.8    | 383 | 0.065    | 435.3  | 384 | 0.036    | violated               |
| ACQE-5→MD | 957.4              | 404 | 6.83E-47 | 943.5    | 403 | 2.46E-45 | 957.3  | 404 | 6.89E-47 | violated               |
| ADe-5→ACF | 813.6              | 95  | 1.4E-114 | 797.1    | 94  | 7E-112   | 838.4  | 95  | 2.3E-119 | violated               |
| ADe-5→ACQ | 628.3              | 94  | 5.91E-80 | 636.5    | 93  | 6.51E-82 | 643.3  | 94  | 9.62E-83 | violated               |
| MD→ACF    | 182.7              | 35  | 6.84E-22 | 184.0    | 34  | 1.67E-22 | 178.8  | 35  | 3.31E-21 | violated               |
| MD→ACQ    | 143.1              | 35  | 4.99E-15 | 126.1    | 34  | 1.63E-12 | 139.6  | 35  | 1.99E-14 | violated               |
| MDe-5→ACF | 817.3              | 251 | 3.73E-61 | 813.9    | 250 | 6.62E-61 | 815.1  | 251 | 8.11E-61 | violated               |
| MDe-5→ACQ | 625.1              | 250 | 4.68E-34 | 616.3    | 249 | 4.22E-33 | 623.2  | 250 | 8.28E-34 | violated               |
| MDe-5→AD  | 282.6              | 258 | 0.140    | 282.2    | 257 | 0.134    | 282.3  | 258 | 0.143    | pass                   |

Note: MR=Mendelian Randomization; Q=the weighted sum of squared differences between individual effects and the pooled effect across variants, with the weights being those used in the pooling method; IVW=inverse variance weighted method; df=degrees of freedom. A statistically significant Q test suggests the presence of heterogeneity due to pleiotropy or other causes. See online methods for details.

GENETIC OVERLAP: MAJOR DEPRESSION AND ALCOHOL USE

Supplemental Table S6: List of the variants included in the genetic instruments.

GWS: genetic variants with  $p < 5E-8$ ; e-5: additional suggestive variants ( $p < 1E-5$ ).

|                             | GWS                                                                                                                                                                                                                                                                                                                                                                                                                        | e-5                                                                                                                                                                                                                                                                                                                                                                                                                                                                                                                                                                                                                                                                                                                                                                                                                                                                                                                                                                                                                                                                                                                                                                                                                                                                                                                                                                                                                                                                                                                                                                                                                                                                                                                                                                                                                                                                                                                                                                                                                                                                                                                                                                                                                                                                                                                                                                                              |
|-----------------------------|----------------------------------------------------------------------------------------------------------------------------------------------------------------------------------------------------------------------------------------------------------------------------------------------------------------------------------------------------------------------------------------------------------------------------|--------------------------------------------------------------------------------------------------------------------------------------------------------------------------------------------------------------------------------------------------------------------------------------------------------------------------------------------------------------------------------------------------------------------------------------------------------------------------------------------------------------------------------------------------------------------------------------------------------------------------------------------------------------------------------------------------------------------------------------------------------------------------------------------------------------------------------------------------------------------------------------------------------------------------------------------------------------------------------------------------------------------------------------------------------------------------------------------------------------------------------------------------------------------------------------------------------------------------------------------------------------------------------------------------------------------------------------------------------------------------------------------------------------------------------------------------------------------------------------------------------------------------------------------------------------------------------------------------------------------------------------------------------------------------------------------------------------------------------------------------------------------------------------------------------------------------------------------------------------------------------------------------------------------------------------------------------------------------------------------------------------------------------------------------------------------------------------------------------------------------------------------------------------------------------------------------------------------------------------------------------------------------------------------------------------------------------------------------------------------------------------------------|
| MD<br>GWS n=36<br>e-5 n=259 | rs12552;rs1432639;rs8025231;rs12129573;rs12958048;rs247910;rs6905391;rs61867293;rs915057;rs11135349;rs1806153;rs4904738;rs7430565;rs10149470;rs34215985;rs11682175;rs10959913;rs2005864;rs4869056;rs8063603;rs116755193;rs5758265;rs7856424;rs17727765;rs7198928;rs2389016;rs4261101;rs62099069;rs11663393;rs1354115;rs1226412;rs7200826;rs4143229;rs10950398;rs9402472;rs4074723;rs9427672;rs159963;rs11643192;rs56015757 | rs2102341;rs9869821;rs56887639;rs41278104;rs4526442;rs12202410;rs7649917;rs2267983;rs11674333;rs2332571;rs143099908;rs58235352;rs4242470;rs913930;rs2509805;rs77087420;rs7771570;rs12966052;rs9592461;rs7659414;rs73102900;rs141769277;rs574593;rs10131621;rs10913112;rs28567442;rs9355502;rs55993664;rs2237517;rs4660091;rs17229439;rs62188629;rs11140773;rs13112458;rs1518367;rs548886;rs326783;rs12440728;rs28684628;rs10895718;rs6471081;rs7017108;rs4870062;rs174594;rs75903747;rs2514218;rs618190;rs281279;rs13296641;rs71639293;rs13012596;rs79631004;rs1945095;rs1548461;rs7566887;rs7580862;rs6063085;rs142091199;rs3734537;rs7288411;rs2730146;rs75344947;rs17058066;rs7118275;rs13414769;rs1403175;rs1542919;rs11866581;rs191117454;rs12194348;rs9363467;rs6676085;rs3806843;rs4645169;rs12667890;rs7543975;rs2316896;rs73104582;rs115888694;rs4741037;rs2576241;rs12923444;rs10780141;rs13032969;rs2085224;rs113689582;rs9663959;rs386906;rs2412137;rs7558022;rs77115380;rs72652244;rs1965662;rs35445561;rs55977891;rs60101897;rs7130926;rs13213510;rs75801343;rs58141521;rs182589382;rs10818400;rs16851266;rs11718931;rs67253370;rs9541811;rs80315381;rs415551;rs12882789;rs75965579;rs372519;rs141729694;rs67436663;rs10193609;rs11649444;rs1484144;rs10164955;rs6549268;rs11697370;rs79146560;rs751;rs2956287;rs7084559;rs4799949;rs7318041;rs62450957;rs78459865;rs115452;rs7248751;rs11590808;rs12353994;rs117763335;rs8044997;rs74004011;rs117901488;rs7727592;rs4757899;rs1526565;rs6848655;rs16890282;rs17792983;rs11205624;rs451162;rs1551281;rs73080460;rs78732941;rs112754009;rs11060415;rs9939201;rs62568191;rs7144406;rs11867618;rs58671397;rs80054962;rs7805525;rs11749656;rs61915164;rs75712664;rs4550100;rs946121;rs72932364;rs62142905;rs2332700;rs4650228;rs272822;rs9825208;rs11945373;rs7808633;rs2906681;rs117466029;rs6058826;rs4417256;rs622726;rs6009347;rs1848322;rs188208805;rs12414918;rs35733856;rs7096162;rs7603111;rs7685163;rs142270618;rs9359139;rs4478545;rs10023969;rs114810615;rs7942337;rs12541504;rs62510219;rs3955150;rs2842586;rs58587963;rs7294775;rs17747401;rs55942359;rs111998295;rs9859955;rs150508916;rs12325768;rs16840705;rs57867301;rs12252016;rs73257781;rs12209889;rs7862197;rs12673908;rs59427701;rs6715781;rs8094639;rs72805045;rs62296782;rs1488400;rs11659932;rs6722247;rs11065340;rs16855545;rs74978286;rs11172371;rs12767338 |
| AD<br>e-5 n=96              | -                                                                                                                                                                                                                                                                                                                                                                                                                          | rs1229984;rs9571413;rs17028896;rs79171978;rs10789062;rs579837;rs111312143;rs1028427;rs13296886;rs77694582;rs8088633;rs147909804;rs2006682;rs870089;rs78323057;rs7240201;rs5768156;rs187025437;rs10191160;rs56328486;rs2970614;rs7823585;rs697958;rs4615888;rs1730735;rs28360848;rs2160261;rs2206569;rs73186506;rs143900286;rs7712550;rs1415133;rs2757859;rs10198090;rs4233;rs72768646;rs1375349;rs117677392;rs9566204;rs7591637;rs3849554;rs3853252;rs13384037;rs79229737;rs1875144;rs1838821;rs1409313;rs34407172;rs757488;rs114993002;rs13206208;rs56403843;rs12904039;rs77324299;rs2115417;rs968079;rs116020305;rs62459100;rs35979784;rs6935819;rs277827;rs7695188;rs11223625;rs59367695;rs                                                                                                                                                                                                                                                                                                                                                                                                                                                                                                                                                                                                                                                                                                                                                                                                                                                                                                                                                                                                                                                                                                                                                                                                                                                                                                                                                                                                                                                                                                                                                                                                                                                                                                   |



GENETIC OVERLAP: MAJOR DEPRESSION AND ALCOHOL USE

|                              |                                                                                                                                                                                                                                                                                                                                                                                                                                                                                                                                                                                                                                                                                                                                                                                                                                                                                                                                                                               |                                                                                                                                                                                                                                                                                                                                                                                                                                                                                                                                                                                                                                                                                                                                                                                                                                                                                                                                                                                                                                                                                                                                                                                                                                                                                                                                                                                                                                                                                                                                                                                                                                                                                                                                                                                                                                                                                                                                                                                                                                                                                                                                                                                                                                                                                                                                                                                                                                                                                                                                                                                                                                                                                                                                                                                                                                                                                                                                                                                                                                                                                       |
|------------------------------|-------------------------------------------------------------------------------------------------------------------------------------------------------------------------------------------------------------------------------------------------------------------------------------------------------------------------------------------------------------------------------------------------------------------------------------------------------------------------------------------------------------------------------------------------------------------------------------------------------------------------------------------------------------------------------------------------------------------------------------------------------------------------------------------------------------------------------------------------------------------------------------------------------------------------------------------------------------------------------|---------------------------------------------------------------------------------------------------------------------------------------------------------------------------------------------------------------------------------------------------------------------------------------------------------------------------------------------------------------------------------------------------------------------------------------------------------------------------------------------------------------------------------------------------------------------------------------------------------------------------------------------------------------------------------------------------------------------------------------------------------------------------------------------------------------------------------------------------------------------------------------------------------------------------------------------------------------------------------------------------------------------------------------------------------------------------------------------------------------------------------------------------------------------------------------------------------------------------------------------------------------------------------------------------------------------------------------------------------------------------------------------------------------------------------------------------------------------------------------------------------------------------------------------------------------------------------------------------------------------------------------------------------------------------------------------------------------------------------------------------------------------------------------------------------------------------------------------------------------------------------------------------------------------------------------------------------------------------------------------------------------------------------------------------------------------------------------------------------------------------------------------------------------------------------------------------------------------------------------------------------------------------------------------------------------------------------------------------------------------------------------------------------------------------------------------------------------------------------------------------------------------------------------------------------------------------------------------------------------------------------------------------------------------------------------------------------------------------------------------------------------------------------------------------------------------------------------------------------------------------------------------------------------------------------------------------------------------------------------------------------------------------------------------------------------------------------------|
|                              |                                                                                                                                                                                                                                                                                                                                                                                                                                                                                                                                                                                                                                                                                                                                                                                                                                                                                                                                                                               | s12130986;rs138113771;rs117423246;rs77857549;rs1069713;rs72774745;rs7780507;rs75454767;rs12294621;rs115905625;rs117237067;rs7708547;rs2344350;rs7230303;rs4932479;rs17685204;rs6790555;rs11905918;rs117292932;rs116498276;rs34440275;rs7805762;rs1729435;rs80284955;rs2478836;rs9616088;rs17762082;rs58333289;rs62001835;rs419742;rs140551998;rs2211257;rs56287425;rs4673119;rs10209092                                                                                                                                                                                                                                                                                                                                                                                                                                                                                                                                                                                                                                                                                                                                                                                                                                                                                                                                                                                                                                                                                                                                                                                                                                                                                                                                                                                                                                                                                                                                                                                                                                                                                                                                                                                                                                                                                                                                                                                                                                                                                                                                                                                                                                                                                                                                                                                                                                                                                                                                                                                                                                                                                               |
| ACF<br>GWS n=92<br>e-5 n=795 | rs1229984;rs1260326;rs11940694;rs2726036;rs187977087;rs1302808;rs1893659;rs58905411;rs35105141;rs13135092;rs11787216;rs9372625;rs2764740;rs33705;rs11039429;rs362307;rs838145;rs473098;rs11640961;rs62244890;rs9814516;rs113011189;rs138993217;rs1078345;rs62466318;rs748919;rs4726481;rs1788030;rs8614;rs12674337;rs461599;rs17486305;rs61873510;rs7330939;rs10188314;rs6567160;rs1421085;rs13102973;rs6030200;rs1228589;rs117799466;rs13390019;rs2717063;rs6962304;rs139816136;rs9349379;rs2159935;rs73050128;rs650558;rs9905730;rs9906502;rs2453875;rs11864886;rs118188698;rs13263946;rs11999622;rs79616692;rs2193098;rs4241258;rs4417025;rs12930744;rs1515591;rs4739105;rs13178443;rs2746025;rs4135294;rs72768626;rs2244598;rs262240;rs12153855;rs6949878;rs9923768;rs11700855;rs780569;rs6699175;rs62339673;rs72892910;rs489062;rs6750325;rs34092348;rs34473884;rs10165161;rs2111861;rs10510130;rs2862224;rs71651683;rs118134876;rs7143137;rs2450038;rs9403297;rs3809827 | rs4242715;rs13334375;rs7731116;rs1666658;rs7514579;rs13020444;rs9829192;rs72946169;rs2333020;rs6977819;rs1727332;rs4822482;rs10454798;rs10029093;rs17662759;rs4982052;rs17698314;rs2525570;rs7948028;rs7253767;rs28787109;rs6497931;rs11072479;rs518425;rs1592676;rs186347;rs7206833;rs13152711;rs4800204;rs78621285;rs67174000;rs7305229;rs8030809;rs17411201;rs2280334;rs61907308;rs77082783;rs71658797;rs801733;rs920990;rs10278679;rs4883583;rs6810396;rs113569731;rs62477431;rs7970350;rs12139282;rs35073053;rs9959195;rs10893172;rs17185470;rs73168402;rs7919624;rs147913309;rs9649581;rs9313379;rs4877154;rs62135521;rs201438;rs2586462;rs10792669;rs2007761;rs56194430;rs7973103;rs1558426;rs17097556;rs76723380;rs4844948;rs4912532;rs28609675;rs13021035;rs13334065;rs34805485;rs59188188;rs205430;rs4908678;rs150338262;rs34494851;rs4822219;rs9607821;rs185799410;rs3857984;rs10274474;rs613872;rs322776;rs10741228;rs2256042;rs73543300;rs13024996;rs3802134;rs7298932;rs6079439;rs4103350;rs4729573;rs919740;rs12594415;rs17033014;rs146016966;rs2423617;rs7131312;rs11707909;rs550942;rs150620544;rs533143;rs6993770;rs9564398;rs34132475;rs35277691;rs138014720;rs2055581;rs576811;rs74424378;rs565078;rs113695602;rs1605676;rs55834548;rs62032512;rs803223;rs74679146;rs80101850;rs11886864;rs12203592;rs10860227;rs116899184;rs6129084;rs34811474;rs4757589;rs74439139;rs147212529;rs4412427;rs62037863;rs76225816;rs874296;rs9690021;rs17127898;rs2238660;rs2274794;rs2387577;rs28657372;rs4749973;rs6876760;rs7566798;rs8049649;rs11176488;rs113929582;rs11737516;rs11932400;rs13139006;rs68024891;rs8021044;rs194847;rs878650;rs10819272;rs12339878;rs12428363;rs531385;rs7599739;rs911475;rs997467;rs10516441;rs10881995;rs12620112;rs1730142;rs55950970;rs6892188;rs9925015;rs10846422;rs184890270;rs6427160;rs10064927;rs10812220;rs113902570;rs11646721;rs117513075;rs117386364;rs1862205;rs2321871;rs4728701;rs67822265;rs1453027;rs1133822;rs145898511;rs17762018;rs1957891;rs75426915;rs7873013;rs9818981;rs77056814;rs12436192;rs12657131;rs116538582;rs7527242;rs10281159;rs61781392;rs2305656;rs72610002;rs13413257;rs1363119;rs4289073;rs4734113;rs10848575;rs168866;rs9806536;rs1905239;rs35205260;rs76376012;rs77371894;rs10259230;rs11060461;rs149726000;rs7932314;rs8105087;rs9295295;rs11548200;rs142151294;rs565522;rs62271373;rs62576216;rs7197830;rs13096270;rs191050839;rs2608842;rs4798996;rs1158620;rs17214836;rs17648701;rs62149419;rs10830706;rs13354106;rs56328909;rs8133767;rs11070032;rs188810925;rs35505101;rs741300;rs1540687;rs35485971;rs11127264;rs1541456;rs718765;rs72664387;rs78225463;rs825586;rs13248791;rs72633596;rs28847576;rs4742659;rs10616;rs12192387;rs1286254;rs183848312;rs140894866;rs75743445;rs5770872;rs12640626;rs189869162;rs13021454;rs61825452;rs1762777;rs1022666;rs112819214;rs76201730;rs2618615;rs4491284;rs59762781;rs75973672;rs16977123;rs2244460;rs72711443;rs7780801;rs9394656;rs10847019;rs12576516;rs2286975;rs11030578;rs75336816;rs1083337;rs11705838;rs11750012;rs190661793;rs1835366;rs1001 |

GENETIC OVERLAP: MAJOR DEPRESSION AND ALCOHOL USE

|  |  |                                                                                                                                                                                                                                                                                                                                                                                                                                                                                                                                                                                                                                                                                                                                                                                                                                                                                                                                                                                                                                                                                                                                                                                                                                                                                                                                                                                                                                                                                                                                                                                                                                                                                                                                                                                                                                                                                                                                                                                                                                                                                                                                                                                                                                                                                                                                                                                                                                                                                                                                                                                                                                                                                                                                                                                                                                                                                                                                                                                                                                                                                                                                                                                                                                                                                                                                                                                                                                                                                                                                                                                                                            |
|--|--|----------------------------------------------------------------------------------------------------------------------------------------------------------------------------------------------------------------------------------------------------------------------------------------------------------------------------------------------------------------------------------------------------------------------------------------------------------------------------------------------------------------------------------------------------------------------------------------------------------------------------------------------------------------------------------------------------------------------------------------------------------------------------------------------------------------------------------------------------------------------------------------------------------------------------------------------------------------------------------------------------------------------------------------------------------------------------------------------------------------------------------------------------------------------------------------------------------------------------------------------------------------------------------------------------------------------------------------------------------------------------------------------------------------------------------------------------------------------------------------------------------------------------------------------------------------------------------------------------------------------------------------------------------------------------------------------------------------------------------------------------------------------------------------------------------------------------------------------------------------------------------------------------------------------------------------------------------------------------------------------------------------------------------------------------------------------------------------------------------------------------------------------------------------------------------------------------------------------------------------------------------------------------------------------------------------------------------------------------------------------------------------------------------------------------------------------------------------------------------------------------------------------------------------------------------------------------------------------------------------------------------------------------------------------------------------------------------------------------------------------------------------------------------------------------------------------------------------------------------------------------------------------------------------------------------------------------------------------------------------------------------------------------------------------------------------------------------------------------------------------------------------------------------------------------------------------------------------------------------------------------------------------------------------------------------------------------------------------------------------------------------------------------------------------------------------------------------------------------------------------------------------------------------------------------------------------------------------------------------------------------|
|  |  | <p>0043;rs10777337;rs10796098;rs60127739;rs8176510;rs9880967;rs1766167;rs1999124;rs9586550;rs10860862;rs10876200;rs6534293;rs9611883;rs149204679;rs6102221;rs1004478;rs8049975;rs12619698;rs140030075;rs2224873;rs112782399;rs117198910;rs1668145;rs36058267;rs75911910;rs117933573;rs10190125;rs17577546;rs12786237;rs62177355;rs76358731;rs11609860;rs11712750;rs139604081;rs62439319;rs295018;rs34880628;rs10189857;rs2844333;rs28828150;rs72696774;rs7460167;rs985553;rs12337009;rs34853711;rs77518705;rs9564692;rs6864478;rs8015745;rs9544000;rs10787760;rs112972431;rs117274283;rs16835292;rs956752;rs1401955;rs16966646;rs142965466;rs2283460;rs73277969;rs3024629;rs35010655;rs3922824;rs45504492;rs78685194;rs10032667;rs73187733;rs1784862;rs56186469;rs13170975;rs1431558;rs13111060;rs2309241;rs2944776;rs4884859;rs71494763;rs11717913;rs12121490;rs1870998;rs2410001;rs2852045;rs34737940;rs71565748;rs76793233;rs10937101;rs11173335;rs112635299;rs1174687;rs12245197;rs13120213;rs17310025;rs34896720;rs4801850;rs4812700;rs56228311;rs62182135;rs76749787;rs78509406;rs846012;rs10184004;rs10507758;rs10773974;rs10793986;rs11768020;rs11790082;rs13169322;rs2276966;rs35820211;rs4092465;rs62019905;rs6853599;rs7311803;rs7592564;rs79203683;rs35886351;rs36053727;rs62159870;rs6723854;rs7158551;rs7444051;rs7875010;rs11662970;rs11688135;rs13146322;rs141261452;rs145334515;rs1483796;rs153060;rs1981098;rs28409011;rs59927996;rs61499730;rs7561278;rs7594388;rs76183880;rs76354419;rs957523;rs11673889;rs139931532;rs141976463;rs145806557;rs150565883;rs17018664;rs17034081;rs2307273;rs34135807;rs4851300;rs73073894;rs7357754;rs75168584;rs867987;rs1202288;rs12127199;rs17088197;rs2074388;rs35120418;rs4812492;rs6937144;rs7511006;rs76907224;rs7731540;rs9819832;rs11993084;rs12453682;rs13307443;rs144364889;rs149048491;rs1793811;rs2322834;rs4936644;rs60745358;rs60791078;rs74498418;rs7862119;rs111694597;rs11741952;rs12718064;rs1393065;rs1585524;rs1891196;rs356465;rs55905351;rs76825908;rs114546625;rs116212148;rs12194193;rs1966859;rs2971016;rs4732788;rs57057505;rs7332134;rs7789946;rs11106114;rs1119248;rs11589269;rs117555837;rs13020754;rs16981755;rs34480849;rs347675;rs4236892;rs4772811;rs72896573;rs766476;rs78672418;rs9949235;rs11221547;rs117034637;rs12466127;rs17716086;rs2914860;rs35005836;rs366684;rs3845865;rs58740162;rs6485475;rs1001939;rs10460192;rs116581473;rs117123482;rs13147207;rs314961;rs4760029;rs6919440;rs9343;rs10739773;rs117588436;rs12703359;rs17397728;rs28733079;rs389877;rs6013500;rs74615678;rs8107051;rs9546474;rs10245705;rs11688502;rs16991213;rs17049738;rs17083734;rs28693968;rs73088494;rs74531417;rs75229149;rs112779396;rs11674460;rs11775949;rs11805391;rs11971487;rs12145004;rs12250380;rs2660824;rs4744264;rs6480771;rs76749014;rs116896093;rs2862996;rs3101409;rs34650286;rs62535504;rs72886368;rs76050430;rs7616192;rs78903711;rs12491347;rs147839860;rs181817998;rs2399023;rs35031736;rs35438744;rs61908948;rs948656;rs9611007;rs113439251;rs12622374;rs1475259;rs61784580;rs67142644;rs7038598;rs113209907;rs138567114;rs145028172;rs146768419;rs4833353;rs12283755;rs12449895;rs13007283;rs13398888;rs2585593;rs2854045;rs31082;rs34416524;rs62130412;rs62135171;rs634985;rs9845894;rs10795036;rs10936697;rs12711964;rs13433863;rs1476161;rs35464261;rs648044;rs8060733;rs118062442;rs141711348;rs2498034;rs2586895;rs4702635;rs62055084;rs76052955;rs879854;rs9519183;rs1416160;rs2253023;rs2357023;rs41270859;rs7225157;rs9345501;rs1469883;rs1809931;rs181308633;rs1851911;rs191251423;rs2830420;rs56368241;rs57688</p> |
|--|--|----------------------------------------------------------------------------------------------------------------------------------------------------------------------------------------------------------------------------------------------------------------------------------------------------------------------------------------------------------------------------------------------------------------------------------------------------------------------------------------------------------------------------------------------------------------------------------------------------------------------------------------------------------------------------------------------------------------------------------------------------------------------------------------------------------------------------------------------------------------------------------------------------------------------------------------------------------------------------------------------------------------------------------------------------------------------------------------------------------------------------------------------------------------------------------------------------------------------------------------------------------------------------------------------------------------------------------------------------------------------------------------------------------------------------------------------------------------------------------------------------------------------------------------------------------------------------------------------------------------------------------------------------------------------------------------------------------------------------------------------------------------------------------------------------------------------------------------------------------------------------------------------------------------------------------------------------------------------------------------------------------------------------------------------------------------------------------------------------------------------------------------------------------------------------------------------------------------------------------------------------------------------------------------------------------------------------------------------------------------------------------------------------------------------------------------------------------------------------------------------------------------------------------------------------------------------------------------------------------------------------------------------------------------------------------------------------------------------------------------------------------------------------------------------------------------------------------------------------------------------------------------------------------------------------------------------------------------------------------------------------------------------------------------------------------------------------------------------------------------------------------------------------------------------------------------------------------------------------------------------------------------------------------------------------------------------------------------------------------------------------------------------------------------------------------------------------------------------------------------------------------------------------------------------------------------------------------------------------------------------------|

GENETIC OVERLAP: MAJOR DEPRESSION AND ALCOHOL USE

|                                       |                                                                                                                                                                                                                                                                                                                                |                                                                                                                                                                                                                                                                                                                                                                                                                                                                                                                                                                                                                                                                                                                                                                                                                                                                                                                                                                                                                                                                                                                                                                                                                                                                                                                                                                                                                                                                                                                                                                                                                                                                                                                                                                                                                                                                                                                                                                                                                                                                                                                                                                                                                                                                                                                                                                                                                                                                              |
|---------------------------------------|--------------------------------------------------------------------------------------------------------------------------------------------------------------------------------------------------------------------------------------------------------------------------------------------------------------------------------|------------------------------------------------------------------------------------------------------------------------------------------------------------------------------------------------------------------------------------------------------------------------------------------------------------------------------------------------------------------------------------------------------------------------------------------------------------------------------------------------------------------------------------------------------------------------------------------------------------------------------------------------------------------------------------------------------------------------------------------------------------------------------------------------------------------------------------------------------------------------------------------------------------------------------------------------------------------------------------------------------------------------------------------------------------------------------------------------------------------------------------------------------------------------------------------------------------------------------------------------------------------------------------------------------------------------------------------------------------------------------------------------------------------------------------------------------------------------------------------------------------------------------------------------------------------------------------------------------------------------------------------------------------------------------------------------------------------------------------------------------------------------------------------------------------------------------------------------------------------------------------------------------------------------------------------------------------------------------------------------------------------------------------------------------------------------------------------------------------------------------------------------------------------------------------------------------------------------------------------------------------------------------------------------------------------------------------------------------------------------------------------------------------------------------------------------------------------------------|
|                                       |                                                                                                                                                                                                                                                                                                                                | <p>343;rs12167058;rs145250558;rs4533324;rs4546951;rs56319762;rs6436165;rs71193760;rs75311157;rs953120;rs1845295;rs2126642;rs2683206;rs71463381;rs117543392;rs2604321;rs4973430;rs56270168;rs60654199;rs6517139;rs7619783;rs9872904;rs11782346;rs13166413;rs17058952;rs8061067;rs11671255;rs2880768;rs45527334;rs6733138;rs67864638;rs77189738;rs10148864;rs10253794;rs11889901;rs34351747;rs72705581;rs112401820;rs185695806;rs76361844;rs35288079;rs560650;rs59247870;rs6837215;rs7374149;rs78848836;rs112214303;rs12985737;rs217536;rs2206751;rs2381641;rs2876453;rs4446382;rs7834078;rs7950166;rs9357723;rs9784763;rs9940216;rs117384726;rs17430740;rs4718887;rs61278557;rs66994942;rs12054057;rs144230577;rs1521754;rs1906675;rs35868739;rs6884797;rs6961762;rs72687577;rs138034490;rs2107969;rs28412070;rs547667;rs7000542;rs716064;rs72945224;rs7659104;rs849402;rs10990975;rs1347872;rs16853589;rs77149260;rs10254599;rs10742057;rs115695800;rs117286906;rs16882459;rs1808366;rs1887771;rs2837984;rs35486269;rs35574173;rs56186782;rs606151;rs6859485</p>                                                                                                                                                                                                                                                                                                                                                                                                                                                                                                                                                                                                                                                                                                                                                                                                                                                                                                                                                                                                                                                                                                                                                                                                                                                                                                                                                                                                             |
| <p>ACQ<br/>GWS n=31<br/>e-5 n=405</p> | <p>rs1229984;rs28712821;rs1260326;rs13107325;rs1302808;rs11604680;rs528301;rs4309187;rs109536;rs7688435;rs11030084;rs13066050;rs17884691;rs6690101;rs62135525;rs2424645;rs61873510;rs7908206;rs34908430;rs13413953;rs56094641;rs2117760;rs4743012;rs190963713;rs9822731;rs4938236;rs59129513;rs11180333;rs1596178;rs858518</p> | <p>rs9517948;rs3756291;rs117917416;rs2413941;rs884300;rs7928223;rs11640031;rs12124523;rs28450941;rs17747233;rs751527;rs974883;rs7831595;rs7080385;rs11860773;rs2533273;rs28929474;rs2789517;rs3811038;rs7132908;rs2201246;rs2756186;rs4759272;rs2111223;rs34060476;rs7119188;rs35529543;rs4480324;rs56073641;rs114328297;rs1921059;rs158609;rs12714026;rs10960629;rs76771389;rs7539883;rs4696055;rs818014;rs828867;rs174568;rs5757905;rs13167181;rs1380358;rs11678525;rs1266182;rs314743;rs12955111;rs529563;rs113443718;rs4582621;rs62312644;rs7009797;rs5026696;rs28450747;rs3829229;rs6944446;rs7871715;rs12786124;rs1819341;rs368565;rs75772932;rs112709686;rs12337051;rs12692050;rs13361473;rs2107903;rs2882321;rs6722461;rs7144180;rs4756104;rs6683303;rs77123275;rs147711594;rs72811598;rs10975579;rs61776651;rs2567387;rs750396;rs12141953;rs4899268;rs7631586;rs9607812;rs10822145;rs11112972;rs7830638;rs140859990;rs17780429;rs2632526;rs440619;rs79652094;rs62333032;rs7483281;rs75265557;rs79227398;rs113942174;rs20686650;rs78423589;rs113239280;rs245568;rs6562616;rs739625;rs12532031;rs3741212;rs2199841;rs73922180;rs925974;rs11634907;rs1717078;rs72960115;rs9947816;rs10123172;rs77535478;rs1055129;rs11917151;rs10151802;rs7087041;rs79006794;rs7654978;rs13035558;rs147865473;rs1910091;rs4671383;rs79346805;rs11589105;rs13207840;rs291550;rs3905155;rs13098920;rs391957;rs1862054;rs78322172;rs10742977;rs113121679;rs11580207;rs2048121;rs2955256;rs4719223;rs11605042;rs7190081;rs7080200;rs7630012;rs2627088;rs2145596;rs1543442;rs8074036;rs1492791;rs2624562;rs55932213;rs111880612;rs147465378;rs3906093;rs9469907;rs141719031;rs11683493;rs143978198;rs112480981;rs11739041;rs273628;rs11648249;rs61999908;rs77178067;rs2195580;rs2214540;rs2013212;rs67486429;rs12413410;rs13296299;rs6943920;rs80137311;rs10903967;rs13357015;rs1884326;rs1528350;rs2274793;rs59824845;rs7557477;rs76045244;rs429150;rs150575801;rs3112887;rs35572189;rs35753830;rs72729664;rs72910144;rs10421783;rs11054854;rs1834373;rs1873341;rs2735313;rs4630770;rs116276044;rs139855233;rs140430387;rs148754536;rs2017500;rs2311435;rs1230163;rs2554671;rs6086808;rs9349379;rs138864321;rs45536631;rs72648451;rs76829797;rs7700874;rs10798945;rs223496;rs2278464;rs2621288;rs273116;rs72752040;rs7553325;rs7687139;rs846012;rs9403215;rs9533742;rs139716206;rs2227827;rs60816887;rs6136465;rs75393236;rs79949859;rs9904617;rs9972882;rs1536260;rs2798221;rs5928697</p> |

GENETIC OVERLAP: MAJOR DEPRESSION AND ALCOHOL USE

|  |  |                                                                                                                                                                                                                                                                                                                                                                                                                                                                                                                                                                                                                                                                                                                                                                                                                                                                                                                                                                                                                                                                                                                                                                                                                                                                                                                                                                                                                                                                                                                                                                                                                                             |
|--|--|---------------------------------------------------------------------------------------------------------------------------------------------------------------------------------------------------------------------------------------------------------------------------------------------------------------------------------------------------------------------------------------------------------------------------------------------------------------------------------------------------------------------------------------------------------------------------------------------------------------------------------------------------------------------------------------------------------------------------------------------------------------------------------------------------------------------------------------------------------------------------------------------------------------------------------------------------------------------------------------------------------------------------------------------------------------------------------------------------------------------------------------------------------------------------------------------------------------------------------------------------------------------------------------------------------------------------------------------------------------------------------------------------------------------------------------------------------------------------------------------------------------------------------------------------------------------------------------------------------------------------------------------|
|  |  | <p>5;rs6949073;rs12123775;rs1409767;rs17552417;rs57229705;rs75564661;rs7668470;rs113672126;rs1284442;rs2406231;rs75907151;rs9881842;rs12968939;rs469999;rs55881639;rs73102047;rs7540635;rs10226149;rs10786218;rs12534200;rs139854039;rs2045386;rs72833896;rs117237359;rs12693975;rs633314;rs7659621;rs7710699;rs80105397;rs9379850;rs11590627;rs117590151;rs2327440;rs727879;rs12470839;rs17484355;rs56275045;rs55750330;rs7307912;rs117324897;rs142500578;rs10474277;rs143431269;rs9826014;rs117597649;rs12273687;rs1589977;rs1592269;rs2834081;rs4426170;rs58790004;rs6668225;rs7656565;rs10188267;rs111307142;rs1423903;rs284933;rs4140445;rs74488554;rs9309394;rs1467664;rs2545799;rs451276;rs4834397;rs6754723;rs73859938;rs17062232;rs2383378;rs6721107;rs67348902;rs7338687;rs2717789;rs34346764;rs35206901;rs116906779;rs16990831;rs17153120;rs17574146;rs3823057;rs79734662;rs9891699;rs2278342;rs231333;rs2749418;rs6953992;rs117984133;rs17223037;rs17268607;rs7219016;rs10008793;rs117032571;rs572591;rs71600496;rs9311399;rs13138252;rs140070614;rs3876032;rs4631807;rs7026534;rs827102;rs965013;rs117733513;rs11859542;rs12026735;rs1958604;rs3093310;rs74537816;rs10264306;rs12449282;rs17607000;rs72710779;rs113958283;rs117512186;rs13235943;rs204402;rs2439272;rs34319416;rs67008508;rs74650977;rs1329195;rs6720452;rs1199575;rs1211507;rs12378980;rs3914188;rs10413482;rs10761602;rs117572024;rs4726915;rs115226268;rs1377549;rs17225380;rs7544083;rs7816871;rs12317467;rs12673790;rs139850812;rs143166223;rs2163336;rs2851485;rs74514433;rs76443550;rs1335788;rs1948833;rs4897289;rs150722160;rs16839634;rs61960513</p> |
|--|--|---------------------------------------------------------------------------------------------------------------------------------------------------------------------------------------------------------------------------------------------------------------------------------------------------------------------------------------------------------------------------------------------------------------------------------------------------------------------------------------------------------------------------------------------------------------------------------------------------------------------------------------------------------------------------------------------------------------------------------------------------------------------------------------------------------------------------------------------------------------------------------------------------------------------------------------------------------------------------------------------------------------------------------------------------------------------------------------------------------------------------------------------------------------------------------------------------------------------------------------------------------------------------------------------------------------------------------------------------------------------------------------------------------------------------------------------------------------------------------------------------------------------------------------------------------------------------------------------------------------------------------------------|

**Supplemental Figures**

Supplemental Figure S1: Funnel plot (left) and leave-one-out analysis (right) related to the MDe-5 genetic instrument with respect to AD outcome (MDe-5→AD).

Funnel plot reports the contribution of each variant (effect size on the x-axis, 1/SE on the y-axis) to MR estimate (solid lines; light-blue for Inverse Variance Weighted (IVW), blue for MR-Egger). Leave-one-out plot report the MR estimate (IVW) excluding one variant at a time from the genetic instrument.

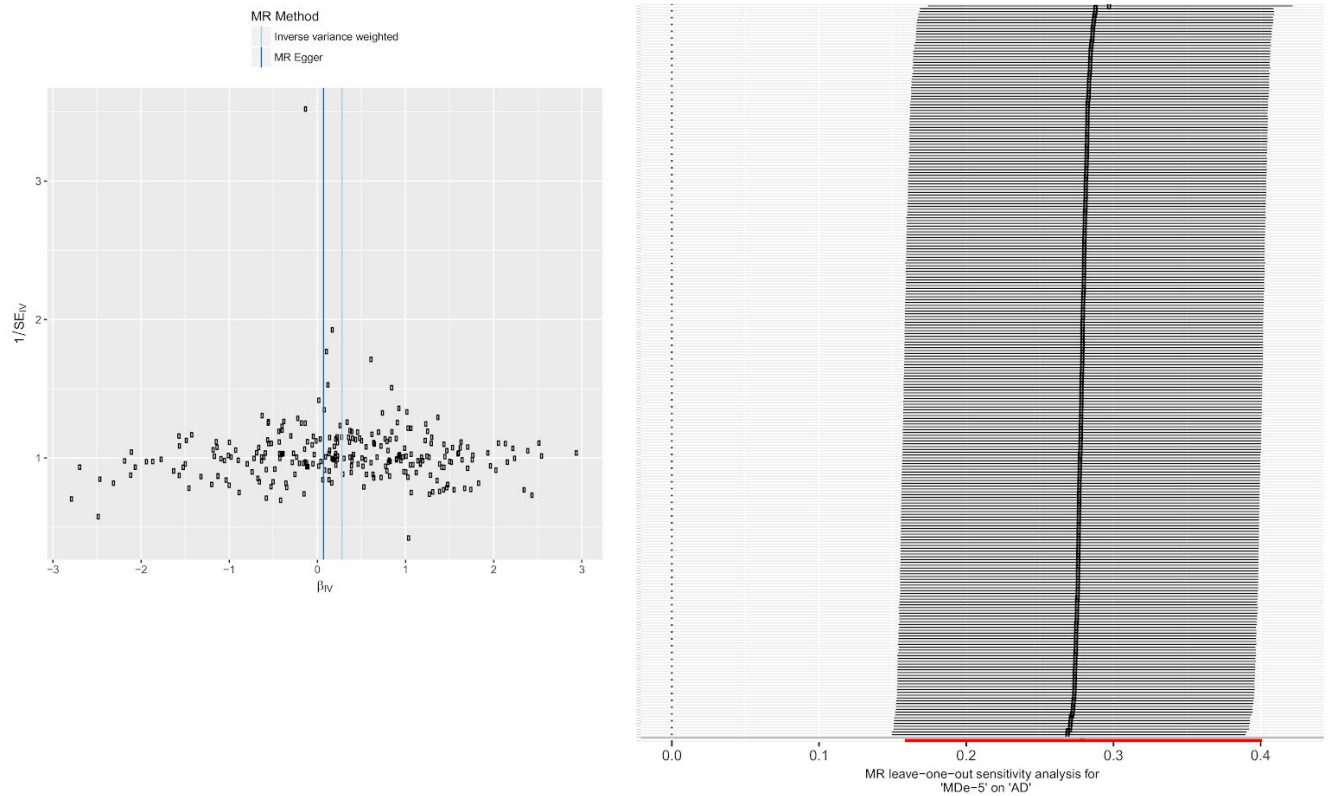

Abbreviations: ACF, alcohol consumption frequency; ACQ, alcohol consumption quantity; AD, alcohol dependence; MD, major depression; IVW, Inverse Variance Weighted.

Supplemental Figure S2: SNP-exposure (AD associations, logOR) and SNP-outcome (MD associations, logOR) coefficients used in the MR analysis. Error bars (95% CIs) are reported for each association.

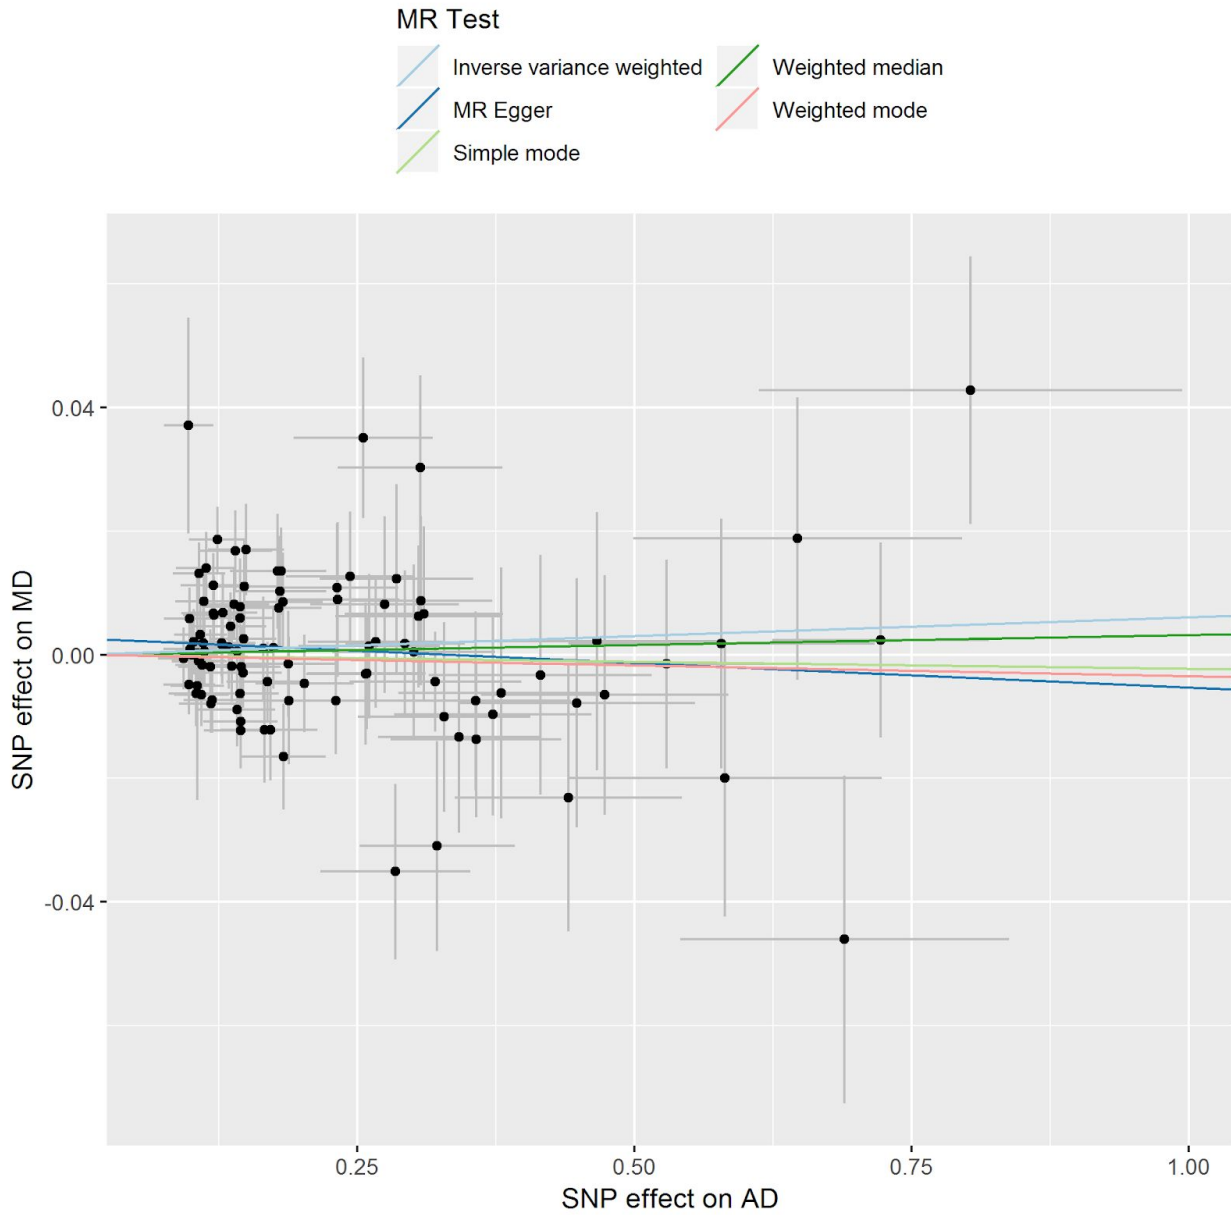

Supplemental Figure S3: Distribution of frequency of drinking in the UK Biobank sample.

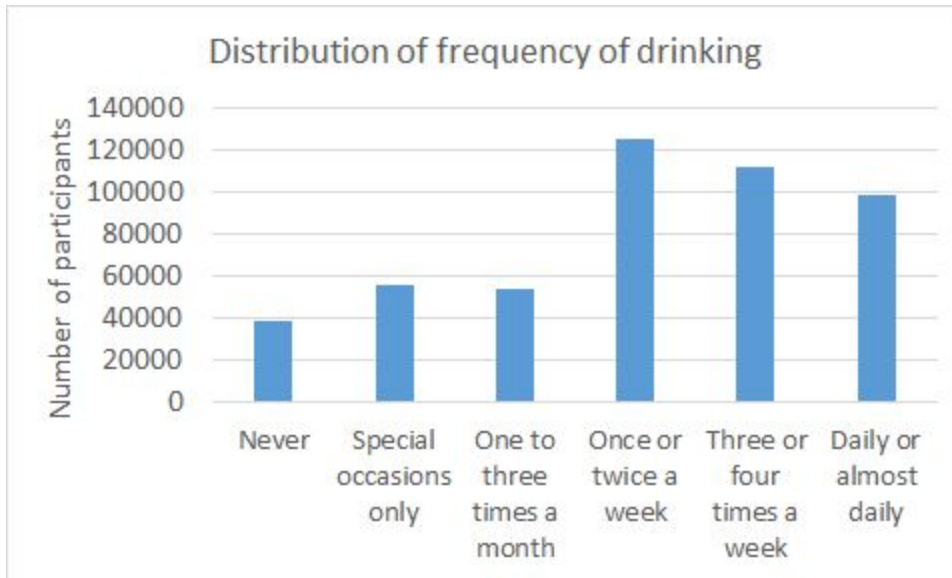

Note: in the original UK Biobank scoring, scores ranged from 1 (daily or almost daily) to 6 (never). In our analyses, scores were recoded to ensure that higher scores represented more frequent drinking.

## Supplemental Methods

### *Quality checks of UKB alcohol consumption measures*

To combine the different classes of alcohol, we followed the procedures developed by Clarke et al.,<sup>1</sup> although a few minor changes were made. In contrast to Clarke et al., we excluded outliers using sex-specific norms and we did not include weight as a covariate in our analysis. To calculate the total units of alcohol, the number of reported drinks was multiplied with a factor depending on the class of alcohol. The factors were 1.67 (red wine and champagne/white wine), 2.3 (beer), 1 (spirit), and 2.25 (fortified wine). We subsequently identified outliers as those who score  $>5$  SD above the average. Outliers were determined in males and females separately. After exclusion of outliers, the mean level of AC-Quantity was 19.90 units (SD=16.26). As expected, the mean level of AC-Quantity was higher in males (mean=25.16; SD=18.72) compared to females (mean=14.42; SD=10.76). Next, we performed a regression analysis including AC-Quantity as the dependent variable and age and sex as predictors. The residuals were used as the outcome measure in genetic association analyses.



*LD score regression analysis*

The method is based on the premise that an estimated SNP effect-size includes effects of all SNPs in linkage disequilibrium (LD) with that SNP. A SNP that tags many other SNPs will have a higher probability of tagging a causal genetic variant compared to a SNP that tags few other SNPs. The LD score measures the amount of genetic variation tagged by a SNP within a specific population. Accordingly, assuming a trait with a polygenic architecture, SNPs with a higher LD-score have on average stronger effect sizes than SNPs with lower LD-scores. When regressing the effect size from the association analysis against the LD score for each SNP, the slope of the regression line provides an estimate of the proportion of variance accounted for by all SNPs included in the estimation of LD scores.<sup>2</sup>

(1) Clarke T, Adams MJ, Davies G, Howard DM, Hall LS, Padmanabhan S, et al. Genome-wide association study of alcohol consumption and genetic overlap with other health-related traits in UK Biobank (N=112 117). *Mol Psychiatry* 2017 Oct;22(10):1376-1384.

(2) Bulik-Sullivan B, Loh P, Finucane HK, Ripke S, Yang J, Patterson N, et al. LD Score regression distinguishes confounding from polygenicity in genome-wide association studies. *Nature genetics* 2015;47(3):291-295.

**Listing of Psychiatric Genomics Consortium Members**

Major Depressive Disorder Working Group

Naomi R Wray\* 1, 2  
 Stephan Ripke\* 3, 4, 5  
 Manuel Mattheisen\* 6, 7, 8, 9  
 Maciej Trzaskowski\* 1  
 Enda M Byrne 1  
 Abdel Abdellaoui 10  
 Mark J Adams 11  
 Esben Agerbo 9, 12, 13  
 Tracy M Air 14  
 Till F M Andlauer 15, 16  
 Silviu-Alin Bacanu 17  
 Marie Bækvad-Hansen 9, 18  
 Aartjan T F Beekman 19  
 Tim B Bigdeli 17, 20  
 Elisabeth B Binder 15, 21  
 Douglas H R Blackwood 11  
 Julien Bryois 22  
 Henriette N Buttenschøn 8, 9, 23  
 Jonas Bybjerg-Grauholm 9, 18  
 Na Cai 24, 25  
 Enrique Castelao 26  
 Jane Hvarregaard Christensen 7, 8, 9  
 Toni-Kim Clarke 11  
 Jonathan R I Coleman 27  
 Lucía Colodro-Conde 28  
 Baptiste Couvy-Duchesne 2, 29  
 Nick Craddock 30  
 Gregory E Crawford 31, 32  
 Gail Davies 33  
 Ian J Deary 33  
 Franziska Degenhardt 34, 35  
 Eske M Derks 28  
 Nese Direk 36, 37  
 Conor V Dolan 10  
 Erin C Dunn 38, 39, 40  
 Thalia C Eley 27  
 Valentina Escott-Price 41  
 Farnush Farhadi Hassan Kiadeh 42  
 Hilary K Finucane 43, 44  
 Andreas J Forstner 34, 35, 45, 46  
 Josef Frank 47  
 Héléna A Gaspar 27  
 Michael Gill 48  
 Fernando S Goes 49  
 Scott D Gordon 28  
 Jakob Grove 7, 8, 9, 50  
 Lynsey S Hall 11, 51  
 Christine Søholm Hansen 9, 18  
 Thomas F Hansen 52, 53, 54  
 Stefan Herms 34, 35, 46  
 Ian B Hickie 55  
 Per Hoffmann 34, 35, 46  
 Georg Homuth 56  
 Carsten Horn 57  
 Jouke-Jan Hottenga 10  
 David M Hougaard 9, 18  
 Marcus Ising 58  
 Rick Jansen 19, 19  
 Ian Jones 59  
 Lisa A Jones 60  
 Eric Jorgenson 61  
 James A Knowles 62  
 Isaac S Kohane 63, 64, 65  
 Julia Kraft 4  
 Warren W. Kretschmar 66  
 Jesper Krogh 67  
 Zoltán Kutalik 68, 69  
 Yihan Li 66

Penelope A Lind 28  
 Donald J MacIntyre 70, 71  
 Dean F MacKinnon 49  
 Robert M Maier 2  
 Wolfgang Maier 72  
 Jonathan Marchini 73  
 Hamdi Mbarek 10  
 Patrick McGrath 74  
 Peter McGuffin 27  
 Sarah E Medland 28  
 Divya Mehta 2, 75  
 Christel M Middeldorp 10, 76, 77  
 Evelin Mihailov 78  
 Yuri Milaneschi 19, 19  
 Lili Milani 78  
 Francis M Mondimore 49  
 Grant W Montgomery 1  
 Sara Mostafavi 79, 80  
 Niamh Mullins 27  
 Matthias Nauck 81, 82  
 Bernard Ng 80  
 Michel G Nivard 10  
 Dale R Nyholt 83  
 Paul F O'Reilly 27  
 Hogni Oskarsson 84  
 Michael J Owen 59  
 Jodie N Painter 28  
 Carsten Bøcker Pedersen 9, 12, 13  
 Marianne Giørtz Pedersen 9, 12, 13  
 Roseann E. Peterson 17, 85  
 Erik Pettersson 22  
 Wouter J Peyrot 19  
 Giorgio Pistis 26  
 Danielle Posthuma 86, 87  
 Jorge A Quiroz 88  
 Per Qvist 7, 8, 9  
 John P Rice 89  
 Brien P. Riley 17  
 Margarita Rivera 27, 90  
 Saira Saeed Mirza 36  
 Robert Schoevers 91  
 Eva C Schulte 92, 93  
 Ling Shen 61  
 Jianxin Shi 94  
 Stanley I Shyn 95  
 Engilbert Sigurdsson 96  
 Grant C B Sinnamon 97  
 Johannes H Smit 19  
 Daniel J Smith 98  
 Hreinn Stefansson 99  
 Stacy Steinberg 99  
 Fabian Streit 47  
 Jana Strohmaier 47  
 Katherine E Tansey 100  
 Henning Teismann 101  
 Alexander Teumer 102  
 Wesley Thompson 9, 53, 103, 104  
 Pippa A Thomson 105  
 Thorgeir E Thorgeirsson 99  
 Matthew Traylor 106  
 Jens Treutlein 47  
 Vassily Trubetskoy 4  
 André G Uitterlinden 107  
 Daniel Umbricht 108  
 Sandra Van der Auwera 109  
 Albert M van Hemert 110  
 Alexander Viktorin 22  
 Peter M Visscher 1, 2  
 Yunpeng Wang 9, 53, 104  
 Bradley T. Webb 111  
 Shantel Marie Weinsheimer 9, 53  
 Jürgen Wellmann 101  
 Gonneke Willemsen 10  
 Stephanie H Witt 47  
 Yang Wu 1  
 Hualin S Xi 112  
 Jian Yang 2, 113  
 Futao Zhang 1

|                                  |                                        |
|----------------------------------|----------------------------------------|
| Volker Arolt 114                 | Bertram Müller-Myhsok 15, 16, 128      |
| Bernhard T Baune 14              | Merete Nordentoft 9, 129               |
| Klaus Berger 101                 | Markus M Nöthen 34, 35                 |
| Dorret I Boomsma 10              | Michael C O'Donovan 59                 |
| Sven Cichon 34, 46, 115, 116     | Sara A Paciga 130                      |
| Udo Dannlowski 114               | Nancy L Pedersen 22                    |
| EJC de Geus 10, 117              | Brenda WJH Penninx 19                  |
| J Raymond DePaulo 49             | Roy H Perlis 38, 131                   |
| Enrico Domenici 118              | David J Porteous 105                   |
| Katharina Domschke 119           | James B Potash 132                     |
| Tõnu Esko 5, 78                  | Martin Preisig 26                      |
| Hans J Grabe 109                 | Marcella Rietschel 47                  |
| Steven P Hamilton 120            | Catherine Schaefer 61                  |
| Caroline Hayward 121             | Thomas G Schulze 47, 93, 133, 134, 135 |
| Andrew C Heath 89                | Jordan W Smoller 38, 39, 40            |
| Kenneth S Kendler 17             | Kari Stefansson 99, 136                |
| Stefan Kloiber 58, 122, 123      | Henning Tiemeier 36, 137, 138          |
| Glyn Lewis 124                   | Rudolf Uher 139                        |
| Qingqin S Li 125                 | Henry Völzke 102                       |
| Susanne Lucae 58                 | Myrna M Weissman 74, 140               |
| Pamela AF Madden 89              | Thomas Werge 9, 53, 141                |
| Patrik K Magnusson 22            | Cathryn M Lewis* 27, 142               |
| Nicholas G Martin 28             | Douglas F Levinson* 143                |
| Andrew M McIntosh 11, 33         | Gerome Breen* 27, 144                  |
| Andres Metspalu 78, 126          | Anders D Børglum* 7, 8, 9              |
| Ole Mors 9, 127                  | Patrick F Sullivan* 22, 145, 146       |
| Preben Bo Mortensen 8, 9, 12, 13 |                                        |

1. Institute for Molecular Bioscience, The University of Queensland, Brisbane, QLD, AU
2. Queensland Brain Institute, The University of Queensland, Brisbane, QLD, AU
3. Analytic and Translational Genetics Unit, Massachusetts General Hospital, Boston, MA, US
4. Department of Psychiatry and Psychotherapy, Universitätsmedizin Berlin Campus Charité Mitte, Berlin, DE
5. Medical and Population Genetics, Broad Institute, Cambridge, MA, US
6. Centre for Psychiatry Research, Department of Clinical Neuroscience, Karolinska Institutet, Stockholm, SE
7. Department of Biomedicine, Aarhus University, Aarhus, DK
8. iSEQ, Centre for Integrative Sequencing, Aarhus University, Aarhus, DK

9. iPSYCH, The Lundbeck Foundation Initiative for Integrative Psychiatric Research,, DK
10. Dept of Biological Psychology & EMGO+ Institute for Health and Care Research, Vrije Universiteit Amsterdam, Amsterdam, NL
11. Division of Psychiatry, University of Edinburgh, Edinburgh, GB
12. Centre for Integrated Register-based Research, Aarhus University, Aarhus, DK
13. National Centre for Register-Based Research, Aarhus University, Aarhus, DK
14. Discipline of Psychiatry, University of Adelaide, Adelaide, SA, AU
15. Department of Translational Research in Psychiatry, Max Planck Institute of Psychiatry, Munich, DE
16. Munich Cluster for Systems Neurology (SyNergy), Munich, DE
17. Department of Psychiatry, Virginia Commonwealth University, Richmond, VA, US
18. Center for Neonatal Screening, Department for Congenital Disorders, Statens Serum Institut, Copenhagen, DK
19. Department of Psychiatry, Vrije Universiteit Medical Center and GGZ inGeest, Amsterdam, NL
20. Virginia Institute for Psychiatric and Behavior Genetics, Richmond, VA, US
21. Department of Psychiatry and Behavioral Sciences, Emory University School of Medicine, Atlanta, GA, US
22. Department of Medical Epidemiology and Biostatistics, Karolinska Institutet, Stockholm, SE
23. Department of Clinical Medicine, Translational Neuropsychiatry Unit, Aarhus University, Aarhus, DK
24. Human Genetics, Wellcome Trust Sanger Institute, Cambridge, GB
25. Statistical genomics and systems genetics, European Bioinformatics Institute (EMBL-EBI), Cambridge, GB
26. Department of Psychiatry, University Hospital of Lausanne, Prilly, Vaud, CH
27. Social Genetic and Developmental Psychiatry Centre, King's College London, London, GB
28. Genetics and Computational Biology, QIMR Berghofer Medical Research Institute, Brisbane, QLD, AU
29. Centre for Advanced Imaging, The University of Queensland, Brisbane, QLD, AU
30. Psychological Medicine, Cardiff University, Cardiff, GB
31. Center for Genomic and Computational Biology, Duke University, Durham, NC, US
32. Department of Pediatrics, Division of Medical Genetics, Duke University, Durham, NC, US
33. Centre for Cognitive Ageing and Cognitive Epidemiology, University of Edinburgh, Edinburgh, GB
34. Institute of Human Genetics, University of Bonn, Bonn, DE
35. Life&Brain Center, Department of Genomics, University of Bonn, Bonn, DE
36. Epidemiology, Erasmus MC, Rotterdam, Zuid-Holland, NL
37. Psychiatry, Dokuz Eylul University School Of Medicine, Izmir, TR
38. Department of Psychiatry, Massachusetts General Hospital, Boston, MA, US

39. Psychiatric and Neurodevelopmental Genetics Unit (PNGU), Massachusetts General Hospital, Boston, MA, US
40. Stanley Center for Psychiatric Research, Broad Institute, Cambridge, MA, US
41. Neuroscience and Mental Health, Cardiff University, Cardiff, GB
42. Bioinformatics, University of British Columbia, Vancouver, BC, CA
43. Department of Epidemiology, Harvard T.H. Chan School of Public Health, Boston, MA, US
44. Department of Mathematics, Massachusetts Institute of Technology, Cambridge, MA, US
45. Department of Psychiatry (UPK), University of Basel, Basel, CH
46. Human Genomics Research Group, Department of Biomedicine, University of Basel, Basel, CH
47. Department of Genetic Epidemiology in Psychiatry, Central Institute of Mental Health, Medical Faculty Mannheim, Heidelberg University, Mannheim, Baden-Württemberg, DE
48. Department of Psychiatry, Trinity College Dublin, Dublin, IE
49. Psychiatry & Behavioral Sciences, Johns Hopkins University, Baltimore, MD, US
50. Bioinformatics Research Centre, Aarhus University, Aarhus, DK
51. Institute of Genetic Medicine, Newcastle University, Newcastle upon Tyne, GB
52. Danish Headache Centre, Department of Neurology, Rigshospitalet, Glostrup, DK
53. Institute of Biological Psychiatry, Mental Health Center Sct. Hans, Mental Health Services Capital Region of Denmark, Copenhagen, DK
54. iPSYCH, The Lundbeck Foundation Initiative for Psychiatric Research, Copenhagen, DK
55. Brain and Mind Centre, University of Sydney, Sydney, NSW, AU
56. Interfaculty Institute for Genetics and Functional Genomics, Department of Functional Genomics, University Medicine and Ernst Moritz Arndt University Greifswald, Greifswald, Mecklenburg-Vorpommern, DE
57. Roche Pharmaceutical Research and Early Development, Pharmaceutical Sciences, Roche Innovation Center Basel, F. Hoffmann-La Roche Ltd, Basel, CH
58. Max Planck Institute of Psychiatry, Munich, DE
59. MRC Centre for Neuropsychiatric Genetics and Genomics, Cardiff University, Cardiff, GB
60. Department of Psychological Medicine, University of Worcester, Worcester, GB
61. Division of Research, Kaiser Permanente Northern California, Oakland, CA, US
62. Psychiatry & The Behavioral Sciences, University of Southern California, Los Angeles, CA, US
63. Department of Biomedical Informatics, Harvard Medical School, Boston, MA, US
64. Department of Medicine, Brigham and Women's Hospital, Boston, MA, US
65. Informatics Program, Boston Children's Hospital, Boston, MA, US
66. Wellcome Trust Centre for Human Genetics, University of Oxford, Oxford, GB
67. Department of Endocrinology at Herlev University Hospital, University of Copenhagen, Copenhagen, DK

68. Institute of Social and Preventive Medicine (IUMSP), University Hospital of Lausanne, Lausanne, VD, CH
69. Swiss Institute of Bioinformatics, Lausanne, VD, CH
70. Division of Psychiatry, Centre for Clinical Brain Sciences, University of Edinburgh, Edinburgh, GB
71. Mental Health, NHS 24, Glasgow, GB
72. Department of Psychiatry and Psychotherapy, University of Bonn, Bonn, DE
73. Statistics, University of Oxford, Oxford, GB
74. Psychiatry, Columbia University College of Physicians and Surgeons, New York, NY, US
75. School of Psychology and Counseling, Queensland University of Technology, Brisbane, QLD, AU
76. Child and Youth Mental Health Service, Children's Health Queensland Hospital and Health Service, South Brisbane, QLD, AU
77. Child Health Research Centre, University of Queensland, Brisbane, QLD, AU
78. Estonian Genome Center, University of Tartu, Tartu, EE
79. Medical Genetics, University of British Columbia, Vancouver, BC, CA
80. Statistics, University of British Columbia, Vancouver, BC, CA
81. DZHK (German Centre for Cardiovascular Research), Partner Site Greifswald, University Medicine, University Medicine Greifswald, Greifswald, Mecklenburg-Vorpommern, DE
82. Institute of Clinical Chemistry and Laboratory Medicine, University Medicine Greifswald, Greifswald, Mecklenburg-Vorpommern, DE
83. Institute of Health and Biomedical Innovation, Queensland University of Technology, Brisbane, QLD, AU
84. Humus, Reykjavik, IS
85. Virginia Institute for Psychiatric & Behavioral Genetics, Virginia Commonwealth University, Richmond, VA, US
86. Clinical Genetics, Vrije Universiteit Medical Center, Amsterdam, NL
87. Complex Trait Genetics, Vrije Universiteit Amsterdam, Amsterdam, NL
88. Solid Biosciences, Boston, MA, US
89. Department of Psychiatry, Washington University in Saint Louis School of Medicine, Saint Louis, MO, US
90. Department of Biochemistry and Molecular Biology II, Institute of Neurosciences, Center for Biomedical Research, University of Granada, Granada, ES
91. Department of Psychiatry, University of Groningen, University Medical Center Groningen, Groningen, NL
92. Department of Psychiatry and Psychotherapy, Medical Center of the University of Munich, Campus Innenstadt, Munich, DE
93. Institute of Psychiatric Phenomics and Genomics (IPPG), Medical Center of the University of Munich, Campus Innenstadt, Munich, DE

94. Division of Cancer Epidemiology and Genetics, National Cancer Institute, Bethesda, MD, US
95. Behavioral Health Services, Kaiser Permanente Washington, Seattle, WA, US
96. Faculty of Medicine, Department of Psychiatry, University of Iceland, Reykjavik, IS
97. School of Medicine and Dentistry, James Cook University, Townsville, QLD, AU
98. Institute of Health and Wellbeing, University of Glasgow, Glasgow, GB
99. deCODE Genetics / Amgen, Reykjavik, IS
100. College of Biomedical and Life Sciences, Cardiff University, Cardiff, GB
101. Institute of Epidemiology and Social Medicine, University of Münster, Münster, Nordrhein-Westfalen, DE
102. Institute for Community Medicine, University Medicine Greifswald, Greifswald, Mecklenburg-Vorpommern, DE
103. Department of Psychiatry, University of California, San Diego, San Diego, CA, US
104. KG Jebsen Centre for Psychosis Research, Norway Division of Mental Health and Addiction, Oslo University Hospital, Oslo, NO
105. Medical Genetics Section, CGEM, IGMM, University of Edinburgh, Edinburgh, GB
106. Clinical Neurosciences, University of Cambridge, Cambridge, GB
107. Internal Medicine, Erasmus MC, Rotterdam, Zuid-Holland, NL
108. Roche Pharmaceutical Research and Early Development, Neuroscience, Ophthalmology and Rare Diseases Discovery & Translational Medicine Area, Roche Innovation Center Basel, F. Hoffmann-La Roche Ltd, Basel, CH
109. Department of Psychiatry and Psychotherapy, University Medicine Greifswald, Greifswald, Mecklenburg-Vorpommern, DE
110. Department of Psychiatry, Leiden University Medical Center, Leiden, NL
111. Virginia Institute for Psychiatric & Behavioral Genetics, Virginia Commonwealth University, Richmond, VA, US
112. Computational Sciences Center of Emphasis, Pfizer Global Research and Development, Cambridge, MA, US
113. Institute for Molecular Bioscience; Queensland Brain Institute, The University of Queensland, Brisbane, QLD, AU
114. Department of Psychiatry, University of Münster, Münster, Nordrhein-Westfalen, DE
115. Institute of Medical Genetics and Pathology, University Hospital Basel, University of Basel, Basel, CH
116. Institute of Neuroscience and Medicine (INM-1), Research Center Juelich, Juelich, DE
117. Amsterdam Public Health Institute, Vrije Universiteit Medical Center, Amsterdam, NL
118. Centre for Integrative Biology, Università degli Studi di Trento, Trento, Trentino-Alto Adige, IT
119. Department of Psychiatry and Psychotherapy, Medical Center, University of Freiburg, Faculty of Medicine, University of Freiburg, Freiburg, DE



120. Psychiatry, Kaiser Permanente Northern California, San Francisco, CA, US
121. Medical Research Council Human Genetics Unit, Institute of Genetics and Molecular Medicine, University of Edinburgh, Edinburgh, GB
122. Department of Psychiatry, University of Toronto, Toronto, ON, CA
123. Centre for Addiction and Mental Health, Toronto, ON, CA
124. Division of Psychiatry, University College London, London, GB
125. Neuroscience Therapeutic Area, Janssen Research and Development, LLC, Titusville, NJ, US
126. Institute of Molecular and Cell Biology, University of Tartu, Tartu, EE
127. Psychosis Research Unit, Aarhus University Hospital, Risskov, Aarhus, DK
128. University of Liverpool, Liverpool, GB
129. Mental Health Center Copenhagen, Copenhagen University Hospital, Copenhagen, DK
130. Human Genetics and Computational Biomedicine, Pfizer Global Research and Development, Groton, CT, US
131. Psychiatry, Harvard Medical School, Boston, MA, US
132. Psychiatry, University of Iowa, Iowa City, IA, US
133. Department of Psychiatry and Behavioral Sciences, Johns Hopkins University, Baltimore, MD, US
134. Department of Psychiatry and Psychotherapy, University Medical Center Göttingen, Goettingen, Niedersachsen, DE
135. Human Genetics Branch, NIMH Division of Intramural Research Programs, Bethesda, MD, US
136. Faculty of Medicine, University of Iceland, Reykjavik, IS
137. Child and Adolescent Psychiatry, Erasmus MC, Rotterdam, Zuid-Holland, NL
138. Psychiatry, Erasmus MC, Rotterdam, Zuid-Holland, NL
139. Psychiatry, Dalhousie University, Halifax, NS, CA
140. Division of Epidemiology, New York State Psychiatric Institute, New York, NY, US
141. Department of Clinical Medicine, University of Copenhagen, Copenhagen, DK
142. Department of Medical & Molecular Genetics, King's College London, London, GB
143. Psychiatry & Behavioral Sciences, Stanford University, Stanford, CA, US
144. NIHR BRC for Mental Health, King's College London, London, GB
145. Genetics, University of North Carolina at Chapel Hill, Chapel Hill, NC, US
146. Psychiatry, University of North Carolina at Chapel Hill, Chapel Hill, NC, US

## Substance Use Disorder Working Group

Raymond K. Walters<sup>1</sup>, Amy E. Adkins<sup>2</sup>, Fazil Aliev<sup>3</sup>, Silviu-Alin Bacanu<sup>4</sup>, Anthony Batzler<sup>5</sup>, Sarah Bertelsen<sup>6</sup>, Joanna M. Biernacka<sup>7</sup>, Tim B. Bigdeli<sup>8</sup>, Li-Shiun Chen<sup>9</sup>, Yi-Ling Chou<sup>9</sup>, Franziska Degenhardt<sup>10</sup>, Anna R. Docherty<sup>11</sup>, Jerome Foo<sup>12</sup>, Louis Fox<sup>9</sup>, Josef Frank<sup>12</sup>, Ina Giegling<sup>13</sup>, Scott Gordon<sup>14</sup>, Laura M. Hack<sup>15</sup>, Annette M. Hartmann<sup>13</sup>, Sarah M. Hartz<sup>9</sup>, Stefanie Heilmann-Heimbach<sup>10</sup>, Stefan Herms<sup>10,16</sup>, Colin Hodgkinson<sup>17</sup>, Per Hoffmann<sup>10,16</sup>, Jouke Jan Hottenga<sup>18</sup>, Emma C. Johnson<sup>9</sup>, Martin A. Kennedy<sup>19</sup>, Bettina Konte<sup>13</sup>, Jari Lahti<sup>20,21</sup>, Marius Lahti-Pulkkinen<sup>21</sup>, Lannie Ligthart<sup>18</sup>, Anu Loukola<sup>22</sup>, Brion S. Maher<sup>23</sup>, Hamdi Mbarek<sup>18</sup>, Matthew B. McQueen<sup>24</sup>, Yuri Milaneschi<sup>25</sup>, Teemu Palviainen<sup>22</sup>, John F. Pearson<sup>26</sup>, Roseann E. Peterson<sup>27</sup>, Renato Polimanti<sup>28</sup>, Euijung Ryu<sup>29</sup>, Nancy L. Saccone<sup>30</sup>, Jessica E. Salvatore<sup>3,27</sup>, Melanie Schwandt<sup>31</sup>, Richard Sherva<sup>32</sup>, Fabian Streit<sup>12</sup>, Jana Strohmaier<sup>12</sup>, Nathaniel Thomas<sup>2</sup>, Jen-Chyong Wang<sup>6</sup>, Bradley T. Webb<sup>4</sup>, Robbee Wedow<sup>33</sup>, Leah Wetherill<sup>34</sup>, Amanda G. Wills<sup>35</sup>, Jason D. Boardman<sup>33</sup>, Danfeng Chen<sup>36</sup>, Doo-Sup Choi<sup>37</sup>, William E. Copeland<sup>38</sup>, Robert C. Culverhouse<sup>39</sup>, Norbert Dahmen<sup>40</sup>, Louisa Degenhardt<sup>41</sup>, Benjamin W. Domingue<sup>42</sup>, Mark Frye<sup>43</sup>, Wolfgang Gäbel<sup>44</sup>, Marcus Ising<sup>45</sup>, Margaret Keyes<sup>46</sup>, Falk Kiefer<sup>47</sup>, John Kramer<sup>48</sup>, Samuel Kuperman<sup>48</sup>, Susanne Lucae<sup>45</sup>, Michael T. Lynskey<sup>49</sup>, Wolfgang Maier<sup>50</sup>, Karl Mann<sup>47</sup>, Jeanette Nance McClintick<sup>51</sup>, Jacquelyn L. Meyers<sup>52</sup>, Bertram Müller-Myhsok<sup>53</sup>, John I. Nurnberger<sup>34,54</sup>, Aarno Palotie<sup>1,22,55</sup>, Ulrich Preuss<sup>13,56</sup>, Katri Räikkönen<sup>21</sup>, Maureen D. Reynolds<sup>57</sup>, Monika Ridinger<sup>58</sup>, Norbert Scherbaum<sup>59</sup>, Marc Schuckit<sup>60</sup>, Michael Soyka<sup>61,62</sup>, Jens Treutlein<sup>12</sup>, Stephanie Witt<sup>12</sup>, Norbert Wodarz<sup>63</sup>, Peter Zill<sup>62</sup>, Daniel E. Adkins<sup>11,64</sup>, Joseph M. Boden<sup>19</sup>, Dorret Boomsma<sup>18</sup>, Laura J. Bierut<sup>9</sup>, Sandra A. Brown<sup>60,65</sup>, Kathleen K. Bucholz<sup>9</sup>, Sven Cichon<sup>16</sup>, E. Jane Costello<sup>38</sup>, Nancy Diazgranados<sup>66</sup>, Danielle M. Dick<sup>2,67</sup>, Johan G. Eriksson<sup>68</sup>, Lindsay A. Farrer<sup>32,69</sup>, Tatiana M. Foroud<sup>34</sup>, Nathan A. Gillespie<sup>27</sup>, Alison M. Goate<sup>6</sup>, David Goldman<sup>17,31</sup>, Richard A. Grucza<sup>9</sup>, Dana B. Hancock<sup>70</sup>, Kathleen Mullan Harris<sup>71</sup>, Andrew C. Heath<sup>9</sup>, Victor Hesselbrock<sup>72</sup>, John K. Hewitt<sup>73</sup>, Christian Hopfer<sup>74</sup>, John Horwood<sup>19</sup>, William Iacono<sup>46</sup>, Eric O. Johnson<sup>75</sup>, Jaakko A. Kaprio<sup>22,76</sup>, Victor Karpyak<sup>43</sup>, Kenneth S. Kendler<sup>4</sup>, Henry R. Kranzler<sup>77</sup>, Kenneth Krauter<sup>78</sup>, Paul Lichtenstein<sup>79</sup>, Penelope A. Lind<sup>14</sup>, Matt McGue<sup>46</sup>, Pamela A. F. Madden<sup>9</sup>, Hermine Maes<sup>80</sup>, Patrik Magnusson<sup>79</sup>, Nicholas G. Martin<sup>14</sup>, Sarah E. Medland<sup>14</sup>, Grant W. Montgomery<sup>81</sup>, Elliot C. Nelson<sup>9</sup>, Markus M. Nöthen<sup>82</sup>, Nancy L. Pedersen<sup>79</sup>, Brenda Penninx<sup>25</sup>, Bernice Porjesz<sup>52</sup>, John P. Rice<sup>9</sup>, Marcella Rietschel<sup>12</sup>, Brien P. Riley<sup>4</sup>, Richard Rose<sup>83</sup>, Dan Rujescu<sup>13</sup>, Pei-Hong Shen<sup>17</sup>, Judy Silberg<sup>27</sup>, Michael C. Stallings<sup>73</sup>, Ralph E. Tarter<sup>57</sup>, Michael M. Vanyukov<sup>57</sup>, Scott Vrieze<sup>46</sup>, Tamara L. Wall<sup>60</sup>, John B. Whitfield<sup>14</sup>, Hongyu Zhao<sup>84</sup>, Benjamin M. Neale<sup>1</sup>, Joel Gelernter<sup>85\*</sup>, Howard J. Edenberg<sup>34,51\*</sup>, Arpana Agrawal<sup>9\*</sup>

<sup>1</sup> Analytic and Translational Genetics Unit, Department of Medicine, Massachusetts General Hospital and Harvard Medical School, Boston, Massachusetts, USA; Stanley Center for Psychiatric Research, Broad Institute of MIT and Harvard, Cambridge, Massachusetts, USA

<sup>2</sup> Department of Psychology & College Behavioral and Emotional Health Institute, Virginia Commonwealth University

<sup>3</sup> Virginia Commonwealth University, Department of Psychology

<sup>4</sup> Virginia Commonwealth University Alcohol Research Center; Virginia Institute for Psychiatric and Behavioral Genetics; Department of Psychiatry, Virginia Commonwealth University

- <sup>5</sup> Mayo Clinic, Psychiatric Genomics and Pharmacogenomics Program
- <sup>6</sup> Icahn School of Medicine at Mount Sinai, Department of Neuroscience
- <sup>7</sup> Mayo Clinic, Department of Health Sciences Research, and Department of Psychiatry and Psychology
- <sup>8</sup> Department of Psychiatry and Behavioral Sciences, State University of New York Downstate Medical Center
- <sup>9</sup> Washington University School of Medicine, Department of Psychiatry
- <sup>10</sup> Institute of Human Genetics, University of Bonn; and Department of Genomics, Life & Brain Center, University of Bonn
- <sup>11</sup> University of Utah, Department of Psychiatry
- <sup>12</sup> Department of Genetic Epidemiology in Psychiatry, Central Institute of Mental Health, Medical Faculty Mannheim, Heidelberg University
- <sup>13</sup> Martin-Luther-University Halle-Wittenberg, Department of Psychiatry, Psychotherapy and Psychosomatics
- <sup>14</sup> QIMR Berghofer Medical Research Institute
- <sup>15</sup> Department of Psychiatry and Behavioral Sciences, Emory University School of Medicine
- <sup>16</sup> Human Genomics Research Group, Department of Biomedicine, University of Basel Institute of Medical Genetics and Pathology, University Hospital Basel
- <sup>17</sup> NIH/NIAAA, Laboratory of Neurogenetics, NIAAA, NIH, USA
- <sup>18</sup> Department of Biological Psychology, Amsterdam Public Health Research Institute, Vrije Universiteit Amsterdam, Amsterdam, the Netherlands
- <sup>19</sup> University of Otago, Christchurch, New Zealand
- <sup>20</sup> Helsinki Collegium for Advanced Studies, University of Helsinki, Helsinki, Finland
- <sup>21</sup> Department of Psychology and Logopedics, University of Helsinki, Helsinki, Finland
- <sup>22</sup> Institute for Molecular Medicine Finland (FIMM), University of Helsinki, Finland
- <sup>23</sup> Johns Hopkins Bloomberg School of Public Health
- <sup>24</sup> Department of Integrative Physiology, University of Colorado Boulder
- <sup>25</sup> Department of Psychiatry, Amsterdam Public Health Research Institute, VU University Medical Center/GGz inGeest, Amsterdam, the Netherlands
- <sup>26</sup> Biostatistics and Computational Biology Unit, University of Otago, Christchurch, New Zealand
- <sup>27</sup> Virginia Commonwealth University, Virginia Institute for Psychiatric and Behavioral Genetics, Department of Psychiatry
- <sup>28</sup> Department of Psychiatry, Yale School of Medicine and VA CT Healthcare Center, West Haven, CT, USA
- <sup>29</sup> Mayo Clinic, Department of Health Sciences Research
- <sup>30</sup> Washington University School of Medicine, Department of Genetics
- <sup>31</sup> NIH/NIAAA, Office of the Clinical Director
- <sup>32</sup> Department of Medicine (Biomedical Genetics), Boston University School of Medicine

- <sup>33</sup> Institute of Behavioral Science and Department of Sociology, University of Colorado
- <sup>34</sup> Indiana University School of Medicine, Department of Medical and Molecular Genetics
- <sup>35</sup> University of Colorado School of Medicine, Department of Pharmacology
- <sup>36</sup> Stanley Center for Psychiatric Research, Broad Institute of MIT and Harvard, Cambridge, Massachusetts, USA
- <sup>37</sup> Mayo Clinic, Department of Molecular Pharmacology and Experimental Therapeutics
- <sup>38</sup> Duke University Medical Center, Department of Psychiatry and Behavioral Sciences
- <sup>39</sup> Washington University School of Medicine, Department of Medicine and Division of Biostatistics
- <sup>40</sup> Department of Psychiatry, University of Mainz
- <sup>41</sup> National Drug and Alcohol Research Centre, University of New South Wales
- <sup>42</sup> Stanford University Graduate School of Education
- <sup>43</sup> Mayo Clinic, Department of Psychiatry and Psychology
- <sup>44</sup> Department of Psychiatry and Psychotherapy, University of Düsseldorf
- <sup>45</sup> Max-Planck-Institute of Psychiatry
- <sup>46</sup> University of Minnesota, Department of Psychology
- <sup>47</sup> Department of Addictive Behavior and Addiction Medicine, Central Institute of Mental Health, Medical Faculty Mannheim, Heidelberg University
- <sup>48</sup> University of Iowa Roy J and Lucille A Carver College of Medicine, Department of Psychiatry
- <sup>49</sup> Addictions Dept, Institute of Psychiatry, Psychology & Neuroscience, King's College London
- <sup>50</sup> Department of Psychiatry, University of Bonn
- <sup>51</sup> Indiana University School of Medicine, Biochemistry/Molecular Biology
- <sup>52</sup> Henri Begleiter Neurodynamics Laboratory, Department of Psychiatry and Behavioral Sciences, SUNY Downstate Medical Center
- <sup>53</sup> Department of Statistical Genetics, Max-Planck-Institute of Psychiatry
- <sup>54</sup> Department of Psychiatry, Indiana University School of Medicine
- <sup>55</sup> Department of Medicine, Department of Neurology and Department of Psychiatry, Massachusetts General Hospital, Boston, MA, USA
- <sup>56</sup> Vitos Hospital Herborn, Dept. of Psychiatry and Psychotherapy, Herborn
- <sup>57</sup> University of Pittsburgh, School of Pharmacy
- <sup>58</sup> Department of Psychiatry and Psychotherapy, University of Regensburg Psychiatric Health Care Aargau
- <sup>59</sup> LVR-Hospital Essen, Department of Psychiatry and Psychotherapy, Department of Addictive Behaviour and Addiction Medicine, Medical Faculty, University of Duisburg-Essen
- <sup>60</sup> University of California San Diego, Department of Psychiatry
- <sup>61</sup> Medical Park Chiemseeblick in Bernau-Felden
- <sup>62</sup> Psychiatric Hospital, Ludwig-Maximilians-University
- <sup>63</sup> Department of Psychiatry and Psychotherapy, University of Regensburg
- <sup>64</sup> University of Utah, Department of Sociology

- <sup>65</sup> University of California, San Diego School of Medicine, Department of Psychology
- <sup>66</sup> NIAAA Intramural Research Program
- <sup>67</sup> Department of Human & Molecular Genetics, Virginia Commonwealth University
- <sup>68</sup> Department of General Practice and Primary Health Care, University of Helsinki, Helsinki, Finland and National Institute for Health and Welfare, Finland
- <sup>69</sup> Departments of Neurology, Ophthalmology, Epidemiology, and Biostatistics, Boston University Schools of Medicine and Public Health
- <sup>70</sup> RTI International, Behavioral and Urban Health Program, Behavioral Health and Criminal Justice Division
- <sup>71</sup> Department of Sociology and Carolina Population Center, University of North Carolina at Chapel Hill
- <sup>72</sup> University of Connecticut School of Medicine, Department of Psychiatry
- <sup>73</sup> University of Colorado Boulder, Institute for Behavioral Genetics
- <sup>74</sup> University of Colorado Denver, School of Medicine
- <sup>75</sup> RTI International, Fellows Program
- <sup>76</sup> Department of Public Health, University of Helsinki, Helsinki, Finland
- <sup>77</sup> University of Pennsylvania Perelman School of Medicine, Center for Studies of Addiction, Department of Psychiatry and VISN 4 MIRECC, Crescenz VAMC
- <sup>78</sup> University of Colorado Boulder, Department of Molecular, Cellular, and Developmental Biology
- <sup>79</sup> Department of Medical Epidemiology and Biostatistics, Karolinska Institutet, Stockholm, Sweden
- <sup>80</sup> Virginia Commonwealth University, Virginia Institute for Psychiatric and Behavioral Genetics
- <sup>81</sup> The Institute for Molecular Bioscience, University of Queensland
- <sup>82</sup> Institute of Human Genetics, University of Bonn School of Medicine & University Hospital Bonn
- <sup>83</sup> Department of Psychological & Brain Sciences, Indiana University, Bloomington, IN
- <sup>84</sup> Department of Biostatistics, Yale School of Public Health, Yale University
- <sup>85</sup> Departments of Psychiatry, Genetics, and Neuroscience, Yale University School of Medicine; VA Connecticut Healthcare System

## Acknowledgements

The Psychiatric Genomics Consortium (PGC): We are deeply indebted to the investigators who comprise the PGC, and to the hundreds of thousands of subjects who have shared their life experiences with PGC investigators. The PGC has received major funding from the National Institute of Mental Health and the National Institute on Drug Abuse (PGC3: U01 MH109528 and U01 MH109532, PGC2: U01 MH094421, PGC1:U01MH085520). The Substance Use Disorders Working Group of the Psychiatric Genomics Consortium (PGC-SUD) is supported by funds from NIDA and NIMH to MH109532 and, previously, with analyst support from NIAAA to U01AA008401 (COGA). We gratefully acknowledge the contributing studies and the participants in those studies without whom this effort would not be possible. For a full list of acknowledgements of all individual cohorts included in the PGC-SUD and PGC-MD groups, please see the original publications.

Statistical analyses were carried out on the Genetic Cluster Computer (<http://www.geneticcluster.org>) hosted by SURFsara, which is financially supported by the Netherlands Scientific Organization (NWO 480-05-003) along with a supplement from the Dutch Brain Foundation and the VU University Amsterdam.

Renato Polimanti was supported by a Young Investigator Grant from the American Foundation for Suicide Prevention. Roseann E. Peterson was supported by National Institutes of Health K01 grant MH113848. Nathan A. Gillespie was supported by National Institutes of Health R00 grant R00DA023549.

This paper represents independent research part-funded by the National Institute for Health Research (NIHR) Biomedical Research Centre at South London and Maudsley NHS Foundation Trust and King's College London. The views expressed are those of the authors and not necessarily those of the NHS, the NIHR or the Department of Health and Social Care. This work was conducted using the UK Biobank Resource (application number 25331).

Collaborators for the 23andMe Research Team are: Michelle Agee, Babak Alipanahi, Adam Auton, Robert K. Bell, Katarzyna Bryc, Sarah L. Elson, Pierre Fontanillas, Nicholas A. Furlotte, David A. Hinds, Karen E. Huber, Aaron Kleinman, Nadia K. Litterman, Matthew H. McIntyre, Joanna L. Mountain, Elizabeth S. Noblin, Carrie A.M. Northover, Steven J. Pitts, J. Fah Sathirapongsasuti, Olga V. Sazonova, Janie F. Shelton, Suyash Shringarpure, Chao Tian, Joyce Y. Tung, Vladimir Vacic, Catherine H. Wilson. We thank the research participants of 23andMe.

QIMR (MD): We thank the twins and their families for their willing participation in our studies. NG Martin is supported by the National Health and Medical Research Council, Australia (941177, 971232, 3399450 and 443011). QIMR (AD): Supported by NIH grants AA07535, AA07728, AA13320, AA13321, AA14041, AA11998, AA17688, DA012854, DA019951; by grants from the Australian National Health and Medical Research Council (241944, 339462, 389927, 389875, 389891, 389892, 389938, 442915, 442981, 496739, 552485, 552498); by grants from the Australian Research Council (A7960034, A79906588, A79801419, DP0770096, DP0212016, DP0343921); and by the FP-5 GenomEUtwin Project (QLG2-CT-2002-01254). GWAS genotyping at CIDR was supported by a grant to the late Richard Todd, PhD, MD, former PI of grant AA13320 and a key contributor to research described in this manuscript. S.E.M., D.R.N., A.F.M., M.A.R.F., S.M., D.L.D., and G.W.M. are supported by the National

Health and Medical Research Council (NHMRC) Fellowship Scheme. We acknowledge the contributions of project investigator Alexandre Todorov, PhD at Washington University. We also thank Dixie Statham, Ann Eldridge, Marlene Grace, Kerrie McAloney (sample collection); Lisa Bowdler, Steven Crooks (DNA processing); David Smyth, Harry Beeby, and Daniel Park (IT support) at Queensland Institute of Medical Research, Brisbane Australia. Last, but not least, we thank the twins and their families for their participation.
